# Supplementary material
Source: Elsevier journal article supplement (https://www.sciencedirect.com/science/article/pii/S1695403320300114)
Supplement: mmc1 [file S1695403320300114:mmc1.xlsx]

## Sheet: Suplem 1. Art.+citados ÁREAS
ALLERGY
Autores	Titulo	Fuente	Citas	Intervalo años	Citas/año
[Anonymous]	Guidelines for the Diagnosis and Management of Food Allergy in the United States: Report of the NIAID-Sponsored Expert Panel	Journal of Allergy and Clinical Immunology 2010; 126(6): S5-S58	1186	9	131.778
Brozek, JL; Bousquet, J; Baena-Cagnani, CE; Bonini, S; Canonica, GW; Casale, TB; van Wijk, RG; Ohta, K; Zuberbier, T; Schunemann, HJ	Allergic Rhinitis and its Impact on Asthma (ARIA) guidelines: 2010 Revision	Journal of Allergy and Clinical Immunology 2010; 126(3): 466-476	820	9	91.1111
Sicherer, SH; Sampson, HA	Food allergy	Journal of Allergy and Clinical Immunology 2010; 125(2): S116-S125	620	9	68.8889
Zuberbier, T; Aberer, W; Asero, R; Bindslev-Jensen, C; Brzoza, Z; Canonica, GW; Church, MK; Ensina, LF; Gimenez-Arnau, A; Godse, K; Goncalo, M; Grattan, C; Hebert, J; Hide, M; Kaplan, A; Kapp, A; Latiff, AHA	The EAACI/GA(2)LEN/EDF/WAO Guideline for the definition, classification, diagnosis, and management of urticaria: the 2013 revision and update	Allergy 2014; 69(7): 868-887	609	5	121.8
Lotvall, J; Akdis, CA; Bacharier, LB; Bjermer, L; Casale, TB; Custovic, A; Lemanske, RF; Wardlaw, AJ; Wenzel, SE; Greenberger, PA	Asthma endotypes: A new approach to classification of disease entities within the asthma syndrome	Journal of Allergy and Clinical Immunology 2011; 127(2): 355-360	594	8	74.25
Sicherer, SH; Munoz-Furlong, A; Godbold, JH; Sampson, HA	US prevalence of self-reported peanut, tree nut, and sesame allergy: 11-year follow-up	Journal of Allergy and Clinical Immunology 2010; 125(6): 1322-1326	552	9	61.3333
Cox, L; Nelson, H; Lockey, R; Calabria, C; Chacko, T; Finegold, I; Nelson, M; Weber, R; Bernstein, DI; Blessing-Moore, J; Khan, DA; Lang, DM; Nicklas, RA; Oppenheimer, J; Portnoy, JM; Randolph, C; Schuller,	Allergen immunotherapy: A practice parameter third update	Journal of Allergy and Clinical Immunology 2011; 127(1): 0-0	525	8	65.625
Osborne, NJ; Koplin, JJ; Martin, PE; Gurrin, LC; Lowe, AJ; Matheson, MC; Ponsonby, AL; Wake, M; Tang, MLK; Dharmage, SC; Allen, KJ	Prevalence of challenge-proven IgE-mediated food allergy using population-based sampling and predetermined challenge criteria in infants	Journal of Allergy and Clinical Immunology 2011; 127(3): 668-U188	464	8	58
Stone, KD; Prussin, C; Metcalfe, DD	IgE, mast cells, basophils, and eosinophils	Journal of Allergy and Clinical Immunology 2010; 125(2): S73-S80	454	9	50.4444
Jones, SM; Pons, L; Roberts, JL; Scurlock, AM; Perry, TT; Kulis, M; Shreffler, WG; Steele, P; Henry, KA; Adair, M; Francis, JM; Durham, S; Vickery, BP; Zhong, XP; Burks, AW	Clinical efficacy and immune regulation with peanut oral immunotherapy	Journal of Allergy and Clinical Immunology 2009; 124(2): 292-300	428	10	42.8
CARDIAC & CARDIOVASCULAR SYSTEM
Autores	Titulo	Fuente	Citas	Intervalo años	Citas/año
Kolh, P; Windecker, S; Alfonso, F; Collet, JP; Cremer, J; Falk, V; Filippatos, G; Hamm, C; Head, SJ; Juni, P; Kappetein, AP; Kastrati, A; Knuuti, J; Landmesser, U; Laufer, G; Neumann, FJ; Richter, DJ; Sch	2014 ESC/EACTS Guidelines on myocardial revascularization	European Journal of Cardio-thoracic Surgery 2014; 46(4): 517-592	2983	5	596.6
Vahanian, A; Alfieri, O; Andreotti, F; Antunes, MJ; Baron-Esquivias, G; Baumgartner, H; Borger, MA; Carrel, TP; De Bonis, M; Evangelista, A; Falk, V; Iung, B; Lancellotti, P; Pierard, L; Price, S; Schafers, HJ;	Guidelines on the management of valvular heart disease (version 2012)	European Journal of Cardio-thoracic Surgery 2012; 42(4): S1-S44	1757	7	251
Kirchhof, P; Benussi, S; Kotecha, D; Ahlsson, A; Atar, D; Casadei, B; Castella, M; Diener, HC; Heidbuchel, H; Hendriks, J; Hindricks, G; Manolis, AS; Oldgren, J; Popescu, BA; Schotten, U; Van Putte, B; Varda	2016 ESC Guidelines for the management of atrial fibrillation developed in collaboration with EACTS	European Journal of Cardio-thoracic Surgery 2016; 50(5): E1-E88	1268	3	422.667
Nashef, SAM; Roques, F; Sharples, LD; Nilsson, J; Smith, C; Goldstone, AR; Lockowandt, U	EuroSCORE II dagger	European Journal of Cardio-thoracic Surgery 2012; 41(4): 734-745	865	7	123.571
Kirklin, JK; Naftel, DC; Pagani, FD; Kormos, RL; Stevenson, LW; Blume, ED; Myers, SL; Miller, MA; Baldwin, JT; Young, JB	Seventh INTERMACS annual report: 15,000 patients and counting	Journal of Heart and Lung Transplantation 2015; 34(12): 1495-1504	679	4	169.75
Ferraris, VA; Brown, JR; Despotis, GJ; Hammon, JW; Reece, TB; Saha, SP; Song, HK; Clough, ER; Shore-Lesserson, LJ; Goodnough, LT; Mazer, CD; Shander, A; Stafford-Smith, M; Waters, J; Baker, RA; Dickinson, TA;	2011 Update to The Society of Thoracic Surgeons and the Society of Cardiovascular Anesthesiologists Blood Conservation Clinical Practice Guidelines	Annals of Thoracic Surgery 2011; 91(3): 944-982	632	8	79
O´Brien, SM; Shahian, DM; Filardo, G; Ferraris, VA; Haan, CK; Rich, JB; Normand, SLT; DeLong, ER; Shewan, CM; Dokholyan, RS; Peterson, ED; Edwards, FH; Anderson, RP	The Society of Thoracic Surgeons 2008 Cardiac Surgery Risk Models: Part 2-Isolated Valve Surgery	Annals of Thoracic Surgery 2009; 88(1): S23-S42	624	10	62.4
Shahian, DM; O´Brien, SM; Filardo, G; Ferraris, VA; Haan, CK; Rich, JB; Normand, SLT; DeLong, ER; Shewan, CM; Dokholyan, RS; Peterson, ED; Edwards, FH; Anderson, RP	The Society of Thoracic Surgeons 2008 Cardiac Surgery Risk Models: Part 1-Coronary Artery Bypass Grafting Surgery	Annals of Thoracic Surgery 2009; 88(1): S2-S22	586	10	58.6
Costanzo, MR; Dipchand, A; Starling, R; Anderson, A; Chan, M; Desai, S; Fedson, S; Fisher, P; Gonzales-Stawinski, G; Martinelli, L; McGiffin, D; Parisi, F; Smith, J; Taylor, D; Meiser, B; Webber, S; Baran, D	The International Society of Heart and Lung Transplantation Guidelines for the care of heart transplant recipients	Journal of Heart and Lung Transplantation 2010; 29(8): 914-956	562	9	62.4444
Feldman, D; Pamboukian, SV; Teuteberg, JJ; Birks, E; Lietz, K; Moore, SA; Morgan, JA; Arabia, F; Bauman, ME; Buchholz, HW; Deng, M; Dickstein, ML; El-Banayosy, A; Elliot, T; Goldstein, DJ; Grady, KL; Jones,	The 2013 International Society for Heart and Lung Transplantation Guidelines for mechanical circulatory support: Executive summary	Journal of Heart and Lung Transplantation 2013; 32(2): 157-187	546	6	91
CLINICAL NEUROLOGY
Autores	Titulo	Fuente	Citas	Intervalo años	Citas/año
McKhann, GM; Knopman, DS; Chertkow, H; Hyman, BT; Jack, CR; Kawas, CH; Klunk, WE; Koroshetz, WJ; Manly, JJ; Mayeux, R; Mohs, RC; Morris, JC; Rossor, MN; Scheltens, P; Carrillo, MC; Thies, B; Weintraub, S;	The diagnosis of dementia due to Alzheimer´s disease: Recommendations from the National Institute on Aging-Alzheimer´s Association workgroups on diagnostic guidelines for Alzheimer´s disease	Alzheimers & Dementia 2011; 7(3): 263-269	4754	8	594.25
Polman, CH; Reingold, SC; Banwell, B; Clanet, M; Cohen, JA; Filippi, M; Fujihara, K; Havrdova, E; Hutchinson, M; Kappos, L; Lublin, FD; Montalban, X; O´Connor, P; Sandberg-Wollheim, M; Thompson, AJ; Waubant, E;	Diagnostic Criteria for Multiple Sclerosis: 2010 Revisions to the McDonald Criteria	Annals of Neurology 2011; 69(2): 292-302	4325	8	540.625
Bes, A; Kunkel, R; Lance, JW; Nappi, G; Pfaffenrath, V; Rose, FC; Schoenberg, BS; Soyka, D; Tfelt-Hansen, P; Welch, KMA; Wilkinson, M; Olesen, J; Bousser, MG; Diener, HC; Dodick, D; First, M; Goadsby, PJ;	The International Classification of Headache Disorders, 3rd edition (beta version)	Cephalalgia 2013; 33(9): 629-808	4128	6	688
Albert, MS; DeKosky, ST; Dickson, D; Dubois, B; Feldman, HH; Fox, NC; Gamst, A; Holtzman, DM; Jagust, WJ; Petersen, RC; Snyder, PJ; Carrillo, MC; Thies, B; Phelps, CH	The diagnosis of mild cognitive impairment due to Alzheimer´s disease: Recommendations from the National Institute on Aging-Alzheimer´s Association workgroups on diagnostic guidelines for Alzheimer´s disease	Alzheimers & Dementia 2011; 7(3): 270-279	3480	8	435
Sperling, RA; Aisen, PS; Beckett, LA; Bennett, DA; Craft, S; Fagan, AM; Iwatsubo, T; Jack, CR; Kaye, J; Montine, TJ; Park, DC; Reiman, EM; Rowe, CC; Siemers, E; Stern, Y; Yaffe, K; Carrillo, MC; Thies, B;	Toward defining the preclinical stages of Alzheimer´s disease: Recommendations from the National Institute on Aging-Alzheimer´s Association workgroups on diagnostic guidelines for Alzheimer´s disease	Alzheimers & Dementia 2011; 7(3): 280-292	2815	8	351.875
Jauch, EC; Saver, JL; Adams, HP; Bruno, A; Connors, JJ; Demaerschalk, BM; Khatri, P; McMullan, PW; Qureshi, AI; Rosenfield, K; Scott, PA; Summers, DR; Wang, DZ; Wintermark, M; Yonas, H	Guidelines for the Early Management of Patients With Acute Ischemic Stroke A Guideline for Healthcare Professionals From the American Heart Association/American Stroke Association	Stroke 2013; 44(3): 870-947	2515	6	419.167
Berg, AT; Berkovic, SF; Brodie, MJ; Buchhalter, J; Cross, JH; Boas, WV; Engel, J; French, J; Glauser, TA; Mathern, GW; Moshe, SL; Nordli, D; Plouin, P; Scheffer, IE	Revised terminology and concepts for organization of seizures and epilepsies: Report of the ILAE Commission on Classification and Terminology, 2005-2009	Epilepsia 2010; 51(4): 676-685	2295	9	255
Rascovsky, K; Hodges, JR; Knopman, D; Mendez, MF; Kramer, JH; Neuhaus, J; van Swieten, JC; Seelaar, H; Dopper, EGP; Onyike, CU; Hillis, AE; Josephs, KA; Boeve, BF; Kertesz, A; Seeley, WW; Rankin, KP; Johnson	Sensitivity of revised diagnostic criteria for the behavioural variant of frontotemporal dementia	Brain 2011; 134(): 2456-2477	1704	8	213
Kernan, WN; Ovbiagele, B; Black, HR; Bravata, DM; Chimowitz, MI; Ezekowitz, MD; Fang, MC; Fisher, M; Furie, KL; Heck, DV; Johnston, SC; Kasner, SE; Kittner, SJ; Mitchell, PH; Rich, MW; Richardson, D; Schwamm	Guidelines for the Prevention of Stroke in Patients With Stroke and Transient Ischemic Attack A Guideline for Healthcare Professionals From the American Heart Association/American Stroke Association	Stroke 2014; 45(7): 2160-2236	1548	5	309.6
Wittchen, HU; Jacobi, F; Rehm, J; Gustavsson, A; Svensson, M; Jonsson, B; Olesen, J; Allgulander, C; Alonso, J; Faravelli, C; Fratiglioni, L; Jennum, P; Lieb, R; Maercker, A; van Os, J; Preisig, M; Salvador-	The size and burden of mental disorders and other disorders of the brain in Europe 2010	European Neuropsychopharmacology 2011; 21(9): 655-679	1476	8	184.5
CRITICAL CARE MEDICINE
Autores	Titulo	Fuente	Citas	Intervalo años	Citas/año
Dellinger, RP; Levy, MM; Rhodes, A; Annane, D; Gerlach, H; Opal, SM; Sevransky, JE; Sprung, CL; Douglas, IS; Jaeschke, R; Osborn, TM; Nunnally, ME; Townsend, SR; Reinhart, K; Kleinpell, RM; Angus, DC; Deutsc	Surviving Sepsis Campaign: International Guidelines for Management of Severe Sepsis and Septic Shock: 2012	Critical Care Medicine 2013; 41(2): 580-637	4467	6	744.5
Raghu, G; Collard, HR; Egan, JJ; Martinez, FJ; Behr, J; Brown, KK; Colby, TV; Cordier, JF; Flaherty, KR; Lasky, JA; Lynch, DA; Ryu, JH; Swigris, JJ; Wells, AU; Ancochea, J; Bouros, D; Carvalho, C; Costabe	An Official ATS/ERSARS/ALAT Statement: Idiopathic Pulmonary Fibrosis: Evidence-based Guidelines for Diagnosis and Management	American Journal of Respiratory and Critical Care Medicine 2011; 183(6): 788-824	3181	8	397.625
Lip, GYH; Nieuwlaat, R; Pisters, R; Lane, DA; Crijns, HJGM	Refining Clinical Risk Stratification for Predicting Stroke and Thromboembolism in Atrial Fibrillation Using a Novel Risk Factor-Based Approach The Euro Heart Survey on Atrial Fibrillation	Chest 2010; 137(2): 263-272	2898	9	322
Vestbo, J; Hurd, SS; Agusti, AG; Jones, PW; Vogelmeier, C; Anzueto, A; Barnes, PJ; Fabbri, LM; Martinez, FJ; Nishimura, M; Stockley, RA; Sin, DD; Rodriguez-Roisin, R	Global Strategy for the Diagnosis, Management, and Prevention of Chronic Obstructive Pulmonary Disease GOLD Executive Summary	American Journal of Respiratory and Critical Care Medicine 2013; 187(4): 347-365	2851	6	475.167
Pisters, R; Lane, DA; Nieuwlaat, R; de Vos, CB; Crijns, HJGM; Lip, GYH	A Novel User-Friendly Score (HAS-BLED) To Assess 1-Year Risk of Major Bleeding in Patients With Atrial Fibrillation The Euro Head Survey	Chest 2010; 138(5): 1093-1100	1985	9	220.556
Kearon, C; Akl, EA; Comerota, AJ; Prandoni, P; Bounameaux, H; Goldhaber, SZ; Nelson, ME; Wells, PS; Gould, MK; Dentali, F; Crowther, M; Kahn, SR	Antithrombotic Therapy for VTE Disease Antithrombotic Therapy and Prevention of Thrombosis, 9th ed: American College of Chest Physicians Evidence- Based Clinical Practice Guidelines	Chest 2012; 141(2): E419S-+	1697	7	242.429
Barr, J; Fraser, GL; Puntillo, K; Ely, EW; Gelinas, C; Dasta, JF; Davidson, JE; Devlin, JW; Kress, JP; Davidson, JE; Devlin, JW; Kress, JP; Joffe, AM; Coursin, DB; Herr, DL; Tung, A; Robinson, BRH; Fontai	Clinical Practice Guidelines for the Management of Pain, Agitation, and Delirium in Adult Patients in the Intensive Care Unit	Critical Care Medicine 2013; 41(1): 263-306	1499	6	249.833
Kearon, C; Akl, EA; Ornelas, J; Blaivas, A; Jimenez, D; Bounameaux, H; Huisman, M; King, CS; Morris, TA; Sood, N; Stevens, SM; Vintch, JRE; Wells, P; Woller, SC; Moores, L	Antithrombotic Therapy for VTE Disease CHEST Guideline and Expert Panel Report	Chest 2016; 149(2): 315-352	1351	3	450.333
Travis, WD; Costabel, U; Hansell, DM; King, TE; Lynch, DA; Nicholson, AG; Ryerson, CJ; Ryu, JH; Selman, M; Wells, AU; Behr, J; Bouros, D; Brown, KK; Colby, TV; Collard, HR; Cordeiro, CR; Cottin, V; Cresta	An Official American Thoracic Society/European Respiratory Society Statement: Update of the International Multidisciplinary Classification of the Idiopathic Interstitial Pneumonias	American Journal of Respiratory and Critical Care Medicine 2013; 188(6): 733-748	1149	6	191.5
Moore, WC; Meyers, DA; Wenzel, SE; Teague, WG; Li, HS; Li, XN; D´Agostino, R; Castro, M; Curran-Everett, D; Fitzpatrick, AM; Gaston, B; Jarjour, NN; Sorkness, R; Calhoun, WJ; Chung, KF; Comhair, SAA; Dweik,	Identification of Asthma Phenotypes Using Cluster Analysis in the Severe Asthma Research Program	American Journal of Respiratory and Critical Care Medicine 2010; 181(4): 315-323	1037	9	115.222
DENTISTRY, ORAL SURGERY & MEDICINE
Autores	Titulo	Fuente	Citas	Intervalo años	Citas/año
Eke, PI; Dye, BA; Wei, L; Thornton-Evans, GO; Genco, RJ	Prevalence of Periodontitis in Adults in the United States: 2009 and 2010	Journal of Dental Research 2012; 91(10): 914-920	751	7	107.286
Wennerberg, A; Albrektsson, T	Effects of titanium surface topography on bone integration: a systematic review	Clinical Oral Implants Research 2009; 20(): 172-184	676	10	67.6
Schiffman, E; Ohrbach, R; Truelove, E; Look, J; Anderson, G; Goulet, JP; List, T; Svensson, P; Gonzalez, Y; Lobbezoo, F; Michelotti, A; Brooks, SL; Ceusters, W; Drangsholt, M; Ettlin, D; Gaul, C; Goldberg, L	Diagnostic Criteria for Temporomandibular Disorders (DC/TMD) for Clinical and Research Applications: Recommendations of the International RDC/TMD Consortium Network and Orofacial Pain Special Interest Group	Journal of Oral & Facial Pain and Headache 2014; 28(1): 6-27	638	5	127.6
Ruggiero, SL; Dodson, TB; Assael, LA; Landesberg, R; Marx, RE; Mehrotra, B	American Association of Oral and Maxillofacial Surgeons Position Paper on Bisphosphonate-Related Osteonecrosis of the Jaws-2009 Update	Journal of Oral and Maxillofacial Surgery 2009; 67(5): 2-12	626	10	62.6
Ruggiero, SL; Dodson, TB; Fantasia, J; Goodday, R; Aghaloo, T; Mehrotra, B; O´Ryan, F	American Association of Oral and Maxillofacial Surgeons Position Paper on Medication-Related Osteonecrosis of the Jaw-2014 Update	Journal of Oral and Maxillofacial Surgery 2014; 72(10): 1938-1956	613	5	122.6
Van Meerbeek, B; Yoshihara, K; Yoshida, Y; Mine, A; De Munck, J; Van Landuyt, KL	State of the art of self-etch adhesives	Dental Materials 2011; 27(1): 17-28	521	8	65.125
Marcenes, W; Kassebaum, NJ; Bernabe, E; Flaxman, A; Naghavi, M; Lopez, A; Murray, CJL	Global Burden of Oral Conditions in 1990-2010: A Systematic Analysis	Journal of Dental Research 2013; 92(7): 592-597	487	6	81.1667
Lang, NP; Berglundh, T	Periimplant diseases: where are we now? - Consensus of the Seventh European Workshop on Periodontology	Journal of Clinical Periodontology 2011; 38(): 178-181	475	8	59.375
Pashley, DH; Tay, FR; Breschi, L; Tjaderhane, L; Carvalho, RM; Carrilho, M; Tezvergil-Mutluay, A	State of the art etch-and-rinse adhesives	Dental Materials 2011; 27(1): 1-16	399	8	49.875
Eke, PI; Dye, BA; Wei, L; Slade, GD; Thornton-Evans, GO; Borgnakke, WS; Taylor, GW; Page, RC; Beck, JD; Genco, RJ	Update on Prevalence of Periodontitis in Adults in the United States: NHANES 2009 to 2012	Journal of Periodontology 2015; 86(5): 611-622	387	4	96.75
EMERGENCY MEDICINE
Autores	Titulo	Fuente	Citas	Intervalo años	Citas/año
Nolan, JP; Soar, J; Zideman, DA; Biarent, D; Bossaert, LL; Deakin, C; Koster, RW; Wyllie, J; Bottiger, B	European Resuscitation Council Guidelines for Resuscitation 2010 Section 1 Executive summary	Resuscitation 2010; 81(10): 1219-1276	736	9	81.7778
Deakin, CD; Nolan, JP; Soar, J; Sunde, K; Koster, RW; Smith, GB; Perkins, GD	European Resuscitation Council Guidelines for Resuscitation 2010 Section 4 Adult advanced life support	Resuscitation 2010; 81(10): 1305-1352	707	9	78.5556
Bernstein, SL; Aronsky, D; Duseja, R; Epstein, S; Handel, D; Hwang, U; McCarthy, M; McConnell, KJ; Pines, JM; Rathlev, N; Schafermeyer, R; Zwemer, F; Schull, M; Asplin, BR	The Effect of Emergency Department Crowding on Clinically Oriented Outcomes	Academic Emergency Medicine 2009; 16(1): 1-10	548	10	54.8
Soar, J; Nolan, JP; Bottiger, BW; Perkins, GD; Lott, C; Carli, P; Pellis, T; Sandroni, C; Skrifvars, MB; Smith, GB; Sunde, K; Deakin, CD	European Resuscitation Council Guidelines for Resuscitation 2015 Section 3. Adult advanced life support	Resuscitation 2015; 95(): 100-147	492	4	123
Marsell, R; Einhorn, TA	The biology of fracture healing	Injury-international Journal of the Care of the Injured 2011; 42(6): 551-555	446	8	55.75
Perkins, GD; Handley, AJ; Koster, RW; Castren, M; Smyth, MA; Olasveengen, T; Monsieurs, KG; Raffay, V; Grasner, JT; Wenzel, V; Ristagno, G; Soar, J	European Resuscitation Council Guidelines for Resuscitation 2015 Section 2. Adult basic life support and automated external defibrillation	Resuscitation 2015; 95(): 81-99	367	4	91.75
Koster, RW; Baubin, MA; Bossaert, LL; Caballero, A; Cassan, P; Castren, M; Granja, C; Handley, AJ; Monsieurs, KG; Perkins, GD; Raffay, V; Sandroni, C	European Resuscitation Council Guidelines for Resuscitation 2010 Section 2 Adult basic life support and use of automated external defibrillators	Resuscitation 2010; 81(10): 1277-1292	365	9	40.5556
Nolan, JP; Soar, J; Cariou, A; Cronberg, T; Moulaert, VRM; Deakin, CD; Bottiger, BW; Friberg, H; Sunde, K; Sandroni, C	European Resuscitation Council and European Society of Intensive Care Medicine Guidelines for Post-resuscitation Care 2015 Section 5 of the European Resuscitation Council Guidelines for Resuscitation 2015	Resuscitation 2015; 95(): 202-222	335	4	83.75
Monsieurs, KG; Nolan, JP; Bossaert, LL; Greif, R; Maconochie, IK; Nikolaou, NI; Perkins, GD; Soar, J; Truhlar, A; Wyllie, J; Zideman, DA	European Resuscitation Council Guidelines for Resuscitation 2015 Section 1. Executive summary	Resuscitation 2015; 95(): 1-80	317	4	79.25
Soar, J; Perkins, GD; Abbas, G; Alfonzo, A; Barelli, A; Bierens, JJLM; Brugger, H; Deakin, CD; Dunning, J; Georgiou, M; Handley, AJ; Lockey, DJ; Paal, P; Sandroni, C; Thies, KC; Zideman, DA; Nolan, JP	European Resuscitation Council Guidelines for Resuscitation 2010 Section 8 Cardiac arrest in special circumstances Electrolyte abnormalities, poisoning, drowning, accidental hypothermia, hyperthermia, asthma, anaphylaxis, cardiac surgery, trauma, pregnanc	Resuscitation 2010; 81(10): 1400-1433	312	9	34.6667
ENDOCRINOLOGY & METABOLISM
Autores	Titulo	Fuente	Citas	Intervalo años	Citas/año
Neuhaus, M; Eakin, EG; Straker, L; Owen, N; Dunstan, DW; Reid, N; Healy, GN	Reducing occupational sedentary time: a systematic review and meta-analysis of evidence on activity-permissive workstations	Obesity Reviews 2014; 15(10): 822-838	8716	5	1743.2
[Anonymous]	Diagnosis and Classification of Diabetes Mellitus	Diabetes Care 2010; 33(): S62-S69	5018	9	557.556
Holick, MF; Binkley, NC; Bischoff-Ferrari, HA; Gordon, CM; Hanley, DA; Heaney, RP; Murad, MH; Weaver, CM	Evaluation, Treatment, and Prevention of Vitamin D Deficiency: an Endocrine Society Clinical Practice Guideline	Journal of Clinical Endocrinology & Metabolism 2011; 96(7): 1911-1930	3791	8	473.875
Shaw, JE; Sicree, RA; Zimmet, PZ	Global estimates of the prevalence of diabetes for 2010 and 2030	Diabetes Research and Clinical Practice 2010; 87(1): 4-14	3570	9	396.667
[Anonymous]	Standards of Medical Care in Diabetes-2014	Diabetes Care 2014; 37(): S14-S80	2477	5	495.4
Inzucchi, SE; Bergenstal, RM; Buse, JB; Diamant, M; Ferrannini, E; Nauck, M; Peters, AL; Tsapas, A; Wender, R; Matthews, DR	Management of Hyperglycemia in Type 2 Diabetes: A Patient-Centered Approach	Diabetes Care 2012; 35(6): 1364-1379	2266	7	323.714
Haugen, BR; Alexander, EK; Bible, KC; Doherty, GM; Mandel, SJ; Nikiforov, YE; Pacini, F; Randolph, GW; Sawka, AM; Schlumberger, M; Schuff, KG; Sherman, SI; Sosa, JA; Steward, DL; Tuttle, RM; Wartofsky, L	2015 American Thyroid Association Management Guidelines for Adult Patients with Thyroid Nodules and Differentiated Thyroid Cancer The American Thyroid Association Guidelines Task Force on Thyroid Nodules and Differentiated Thyroid Cancer	Thyroid 2016; 26(1): 1-133	2241	3	747
Nathan, DM; Buse, JB; Davidson, MB; Ferrannini, E; Holman, RR; Sherwin, R; Zinman, B	Medical Management of Hyperglycemia in Type 2 Diabetes: A Consensus Algorithm for the Initiation and Adjustment of Therapy A consensus statement of the American Diabetes Association and the European Association for the Study of Diabetes	Diabetes Care 2009; 32(1): 193-203	2053	10	205.3
Whiting, DR; Guariguata, L; Weil, C; Shaw, J	IDF Diabetes Atlas: Global estimates of the prevalence of diabetes for 2011 and 2030	Diabetes Research and Clinical Practice 2011; 94(3): 311-321	2031	8	253.875
[Anonymous]	Standards of Medical Care in Diabetes-2013	Diabetes Care 2013; 36(): S11-S66	1942	6	323.667
GASTROENTEROLOGY & HEPATOLOGY
Autores	Titulo	Fuente	Citas	Intervalo años	Citas/año
Papatheodoridis, G; Buti, M; Cornberg, M; Janssen, H; Mutimer, D; Pol, S; Raimondo, G	EASL Clinical Practice Guidelines: Management of chronic hepatitis B virus infection	Journal of Hepatology 2012; 57(1): 167-185	2162	7	308.857
Banks, PA; Bollen, TL; Dervenis, C; Gooszen, HG; Johnson, CD; Sarr, MG; Tsiotos, GG; Vege, SS	Classification of acute pancreatitis-2012: revision of the Atlanta classification and definitions by international consensus	Gut 2013; 62(1): 102-111	1579	6	263.167
[Anonymous]	Japanese classification of gastric carcinoma: 3rd English edition	Gastric Cancer 2011; 14(2): 101-112	1578	8	197.25
Husby, S; Koletzko, S; Korponay-Szabo, IR; Mearin, ML; Phillips, A; Shamir, R; Troncone, R; Giersiepen, K; Branski, D; Catassi, C; Lelgeman, M; Maki, M; Ribes-Koninckx, C; Ventura, A; Zimmer, KP	European Society for Pediatric Gastroenterology, Hepatology, and Nutrition Guidelines for the Diagnosis of Coeliac Disease	Journal of Pediatric Gastroenterology and Nutrition 2012; 54(1): 136-160	1192	7	170.286
Hill, C; Guarner, F; Reid, G; Gibson, GR; Merenstein, DJ; Pot, B; Morelli, L; Canani, RB; Flint, HJ; Salminen, S; Calder, PC; Sanders, ME	The International Scientific Association for Probiotics and Prebiotics consensus statement on the scope and appropriate use of the term probiotic	Nature Reviews Gastroenterology & Hepatology 2014; 11(8): 506-514	1177	5	235.4
Younossi, ZM; Koenig, AB; Abdelatif, D; Fazel, Y; Henry, L; Wymer, M	Global Epidemiology of Nonalcoholic Fatty Liver Disease-Meta-Analytic Assessment of Prevalence, Incidence, and Outcomes	Hepatology 2016; 64(1): 73-84	1120	3	373.333
Cani, PD; Possemiers, S; Van de Wiele, T; Guiot, Y; Everard, A; Rottier, O; Geurts, L; Naslain, D; Neyrinck, A; Lambert, DM; Muccioli, GG; Delzenne, NM	Changes in gut microbiota control inflammation in obese mice through a mechanism involving GLP-2-driven improvement of gut permeability	Gut 2009; 58(8): 1091-1103	1118	10	111.8
Williams, CD; Stengel, J; Asike, MI; Torres, DM; Shaw, J; Contreras, M; Landt, CL; Harrison, SA	Prevalence of Nonalcoholic Fatty Liver Disease and Nonalcoholic Steatohepatitis Among a Largely Middle-Aged Population Utilizing Ultrasound and Liver Biopsy: A Prospective Study	Gastroenterology 2011; 140(1): 124-131	1009	8	126.125
Lieberman, DA; Rex, DK; Winawer, SJ; Giardiello, FM; Johnson, DA; Levin, TR	Guidelines for Colonoscopy Surveillance After Screening and Polypectomy: A Consensus Update by the US Multi-Society Task Force on Colorectal Cancer	Gastroenterology 2012; 143(3): 844-857	975	7	139.286
Vrieze, A; Van Nood, E; Holleman, F; Salojarvi, J; Kootte, RS; Bartelsman, JFWM; Dallinga-Thie, GM; Ackermans, MT; Serlie, MJ; Oozeer, R; Derrien, M; Druesne, A; Vlieg, JETV; Bloks, VW; Groen, AK; Heilig, HGHJ;	Transfer of Intestinal Microbiota From Lean Donors Increases Insulin Sensitivity in Individuals With Metabolic Syndrome	Gastroenterology 2012; 143(4): 913-+	973	7	139
GENETICS & HEREDITY
Autores	Titulo	Fuente	Citas	Intervalo años	Citas/año
Tamura, K; Peterson, D; Peterson, N; Stecher, G; Nei, M; Kumar, S	MEGA5: Molecular Evolutionary Genetics Analysis Using Maximum Likelihood, Evolutionary Distance, and Maximum Parsimony Methods	Molecular Biology and Evolution 2011; 28(10): 2731-2739	40891	8	5111.38
Tamura, K; Stecher, G; Peterson, D; Filipski, A; Kumar, S	MEGA6: Molecular Evolutionary Genetics Analysis Version 6.0	Molecular Biology and Evolution 2013; 30(12): 2725-2729	11493	6	1915.5
Kumar, S; Stecher, G; Tamura, K	MEGA7: Molecular Evolutionary Genetics Analysis Version 7.0 for Bigger Datasets	Molecular Biology and Evolution 2016; 33(7): 1870-1874	10455	3	3485
Langmead, B; Trapnell, C; Pop, M; Salzberg, SL	Ultrafast and memory-efficient alignment of short DNA sequences to the human genome	Genome Biology 2009; 10(3): 0-0	10138	10	1013.8
Katoh, K; Standley, DM	MAFFT Multiple Sequence Alignment Software Version 7: Improvements in Performance and Usability	Molecular Biology and Evolution 2013; 30(4): 772-780	8203	6	1367.17
McKenna, A; Hanna, M; Banks, E; Sivachenko, A; Cibulskis, K; Kernytsky, A; Garimella, K; Altshuler, D; Gabriel, S; Daly, M; DePristo, MA	The Genome Analysis Toolkit: A MapReduce framework for analyzing next-generation DNA sequencing data	Genome Research 2010; 20(9): 1297-1303	7567	9	840.778
Anders, S; Huber, W	Differential expression analysis for sequence count data	Genome Biology 2010; 11(10): 0-0	6209	9	689.889
Drummond, AJ; Suchard, MA; Xie, D; Rambaut, A	Bayesian Phylogenetics with BEAUti and the BEAST 1.7	Molecular Biology and Evolution 2012; 29(8): 1969-1973	5456	7	779.429
Kim, D; Pertea, G; Trapnell, C; Pimentel, H; Kelley, R; Salzberg, SL	TopHat2: accurate alignment of transcriptomes in the presence of insertions, deletions and gene fusions	Genome Biology 2013; 14(4): 0-0	5152	6	858.667
DePristo, MA; Banks, E; Poplin, R; Garimella, KV; Maguire, JR; Hartl, C; Philippakis, AA; del Angel, G; Rivas, MA; Hanna, M; McKenna, A; Fennell, TJ; Kernytsky, AM; Sivachenko, AY; Cibulskis, K; Gabriel, SB;	A framework for variation discovery and genotyping using next-generation DNA sequencing data	Nature Genetics 2011; 43(5): 491-+	4377	8	547.125
Friedman, RC; Farh, KKH; Burge, CB; Bartel, DP	Most mammalian mRNAs are conserved targets of microRNAs	Genome Research 2009; 19(1): 92-105	4330	10	433
HEMATOLOGY
Autores	Titulo	Fuente	Citas	Intervalo años	Citas/año
Kanda, Y	Investigation of the freely available easy-to-use software ´EZR´ for medical statistics	Bone Marrow Transplantation 2013; 48(3): 452-458	2824	6	470.667
Vardiman, JW; Thiele, J; Arber, DA; Brunning, RD; Borowitz, MJ; Porwit, A; Harris, NL; Le Beau, MM; Hellstrom-Lindberg, E; Tefferi, A; Bloomfield, CD	The 2008 revision of the World Health Organization (WHO) classification of myeloid neoplasms and acute leukemia: rationale and important changes	Blood 2009; 114(5): 937-951	2456	10	245.6
Ricciotti, E; FitzGerald, GA	Prostaglandins and Inflammation	Arteriosclerosis Thrombosis and Vascular Biology 2011; 31(5): 986-1000	1146	8	143.25
Greenberg, PL; Tuechler, H; Schanz, J; Sanz, G; Garcia-Manero, G; Sole, F; Bennett, JM; Bowen, D; Fenaux, P; Dreyfus, F; Kantarjian, H; Kuendgen, A; Levis, A; Malcovati, L; Cazzola, M; Cermak, J; Fonatsch, C	Revised International Prognostic Scoring System for Myelodysplastic Syndromes	Blood 2012; 120(12): 2454-2465	1106	7	158
Rodeghiero, F; Stasi, R; Gernsheimer, T; Michel, M; Provan, D; Arnold, DM; Bussel, JB; Cines, DB; Chong, BH; Cooper, N; Godeau, B; Lechner, K; Mazzucconi, MG; McMillan, R; Sanz, MA; Imbach, P; Blanchette, V;	Standardization of terminology, definitions and outcome criteria in immune thrombocytopenic purpura of adults and children: report from an international working group	Blood 2009; 113(11): 2386-2393	1068	10	106.8
Ziegler-Heitbrock, L; Ancuta, P; Crowe, S; Dalod, M; Grau, V; Hart, DN; Leenen, PJM; Liu, YJ; MacPherson, G; Randolph, GJ; Scherberich, J; Schmitz, J; Shortman, K; Sozzani, S; Strobl, H; Zembala, M; Austyn,	Nomenclature of monocytes and dendritic cells in blood	Blood 2010; 116(16): E74-E80	1045	9	116.111
van Ryn, J; Stangier, J; Haertter, S; Liesenfeld, KH; Wienen, W; Feuring, M; Clemens, A	Dabigatran etexilate - a novel, reversible, oral direct thrombin inhibitor: Interpretation of coagulation assays and reversal of anticoagulant activity	Thrombosis and Haemostasis 2010; 103(6): 1116-1127	990	9	110
Grimwade, D; Hills, RK; Moorman, AV; Walker, H; Chatters, S; Goldstone, AH; Wheatley, K; Harrison, CJ; Burnett, AK	Refinement of cytogenetic classification in acute myeloid leukemia: determination of prognostic significance of rare recurring chromosomal abnormalities among 5876 younger adult patients treated in the United Kingdom Medical Research Council trials	Blood 2010; 116(3): 354-365	979	9	108.778
Libby, P	Inflammation in Atherosclerosis	Arteriosclerosis Thrombosis and Vascular Biology 2012; 32(9): 2045-2051	907	7	129.571
Campo, E; Swerdlow, SH; Harris, NL; Pileri, S; Stein, H; Jaffe, ES	The 2008 WHO classification of lymphoid neoplasms and beyond: evolving concepts and practical applications	Blood 2011; 117(19): 5019-5032	903	8	112.875
IMMUNOLOGY
Autores	Titulo	Fuente	Citas	Intervalo años	Citas/año
Kanda, Y	Investigation of the freely available easy-to-use software ´EZR´ for medical statistics	Bone Marrow Transplantation 2013; 48(3): 452-458	2824	6	470.667
Boucher, HW; Talbot, GH; Bradley, JS; Edwards, JE; Gilbert, D; Rice, LB; Scheld, M; Spellberg, B; Bartlett, J	Bad Bugs, No Drugs: No ESKAPE! An Update from the Infectious Diseases Society of America	Clinical Infectious Diseases 2009; 48(1): 1-12	2540	10	254
Scallan, E; Griffin, PM; Angulo, FJ; Tauxe, RV; Hoekstra, RM	Foodborne Illness Acquired in the United States-Unspecified Agents	Emerging Infectious Diseases 2011; 17(1): 16-22	2485	8	310.625
Scallan, E; Hoekstra, RM; Angulo, FJ; Tauxe, RV; Widdowson, MA; Roy, SL; Jones, JL; Griffin, PM	Foodborne Illness Acquired in the United States-Major Pathogens	Emerging Infectious Diseases 2011; 17(1): 7-15	1467	8	183.375
Nakahira, K; Haspel, JA; Rathinam, VAK; Lee, SJ; Dolinay, T; Lam, HC; Englert, JA; Rabinovitch, M; Cernadas, M; Kim, HP; Fitzgerald, KA; Ryter, SW; Choi, AMK	Autophagy proteins regulate innate immune responses by inhibiting the release of mitochondrial DNA mediated by the NALP3 inflammasome	Nature Immunology 2011; 12(3): 222-U57	1268	8	158.5
Park, BJ; Wannemuehler, KA; Marston, BJ; Govender, N; Pappas, PG; Chiller, TA	Estimation of the current global burden of cryptococcal meningitis among persons living with HIV/AIDS	Aids 2009; 23(4): 525-530	1197	10	119.7
[Anonymous]	Guidelines for the Diagnosis and Management of Food Allergy in the United States: Report of the NIAID-Sponsored Expert Panel	Journal of Allergy and Clinical Immunology 2010; 126(6): S5-S58	1186	9	131.778
Liu, C; Bayer, A; Cosgrove, SE; Daum, RS; Fridkin, SK; Gorwitz, RJ; Kaplan, SL; Karchmer, AW; Levine, DP; Murray, BE; Rybak, MJ; Talan, DA; Chambers, HF	Clinical Practice Guidelines by the Infectious Diseases Society of America for the Treatment of Methicillin-Resistant Staphylococcus Aureus Infections in Adults and Children	Clinical Infectious Diseases 2011; 52(3): E18-E55	1168	8	146
Spits, H; Artis, D; Colonna, M; Diefenbach, A; Di Santo, JP; Eberl, G; Koyasu, S; Locksley, RM; McKenzie, ANJ; Mebius, RE; Powrie, F; Vivier, E	Innate lymphoid cells - a proposal for uniform nomenclature	Nature Reviews Immunology 2013; 13(2): 145-149	1134	6	189
Freifeld, AG; Bow, EJ; Sepkowitz, KA; Boeckh, MJ; Ito, JI; Mullen, CA; Raad, II; Rolston, KV; Young, JAH; Wingard, JR	Clinical Practice Guideline for the Use of Antimicrobial Agents in Neutropenic Patients with Cancer: 2010 Update by the Infectious Diseases Society of America	Clinical Infectious Diseases 2011; 52(4): E56-E93	1128	8	141
INFECTIOUS DISEASES
Autores	Titulo	Fuente	Citas	Intervalo años	Citas/año
Magiorakos, AP; Srinivasan, A; Carey, RB; Carmeli, Y; Falagas, ME; Giske, CG; Harbarth, S; Hindler, JF; Kahlmeter, G; Olsson-Liljequist, B; Paterson, DL; Rice, LB; Stelling, J; Struelens, MJ; Vatopoulos, A; Web	Multidrug-resistant, extensively drug-resistant and pandrug-resistant bacteria: an international expert proposal for interim standard definitions for acquired resistance	Clinical Microbiology and Infection 2012; 18(3): 268-281	2928	7	418.286
Boucher, HW; Talbot, GH; Bradley, JS; Edwards, JE; Gilbert, D; Rice, LB; Scheld, M; Spellberg, B; Bartlett, J	Bad Bugs, No Drugs: No ESKAPE! An Update from the Infectious Diseases Society of America	Clinical Infectious Diseases 2009; 48(1): 1-12	2540	10	254
Scallan, E; Griffin, PM; Angulo, FJ; Tauxe, RV; Hoekstra, RM	Foodborne Illness Acquired in the United States-Unspecified Agents	Emerging Infectious Diseases 2011; 17(1): 16-22	2485	8	310.625
Cohen, SH; Gerding, DN; Johnson, S; Kelly, CP; Loo, VG; McDonald, LC; Pepin, J; Wilcox, MH	Clinical Practice Guidelines for Clostridium difficile Infection in Adults: 2010 Update by the Society for Healthcare Epidemiology of America (SHEA) and the Infectious Diseases Society of America (IDSA)	Infection Control and Hospital Epidemiology 2010; 31(5): 431-455	1900	9	211.111
Kumarasamy, KK; Toleman, MA; Walsh, TR; Bagaria, J; Butt, F; Balakrishnan, R; Chaudhary, U; Doumith, M; Giske, CG; Irfan, S; Krishnan, P; Kumar, AV; Maharjan, S; Mushtaq, S; Noorie, T; Paterson, DL; Pearson,	Emergence of a new antibiotic resistance mechanism in India, Pakistan, and the UK: a molecular, biological, and epidemiological study	Lancet Infectious Diseases 2010; 10(9): 597-602	1561	9	173.444
Liu, YY; Wang, Y; Walsh, TR; Yi, LX; Zhang, R; Spencer, J; Doi, Y; Tian, GB; Dong, BL; Huang, XH; Yu, LF; Gu, DX; Ren, HW; Chen, XJ; Lv, LC; He, DD; Zhou, HW; Liang, ZS; Liu, JH; Shen, JZ	Emergence of plasmid-mediated colistin resistance mechanism MCR-1 in animals and human beings in China: a microbiological and molecular biological study	Lancet Infectious Diseases 2016; 16(2): 161-168	1511	3	503.667
Scallan, E; Hoekstra, RM; Angulo, FJ; Tauxe, RV; Widdowson, MA; Roy, SL; Jones, JL; Griffin, PM	Foodborne Illness Acquired in the United States-Major Pathogens	Emerging Infectious Diseases 2011; 17(1): 7-15	1467	8	183.375
Zankari, E; Hasman, H; Cosentino, S; Vestergaard, M; Rasmussen, S; Lund, O; Aarestrup, FM; Larsen, MV	Identification of acquired antimicrobial resistance genes	Journal of Antimicrobial Chemotherapy 2012; 67(11): 2640-2644	1218	7	174
Laxminarayan, R; Duse, A; Wattal, C; Zaidi, AKM; Wertheim, HFL; Sumpradit, N; Vlieghe, E; Hara, GL; Gould, IM; Goossens, H; Greko, C; So, AD; Bigdeli, M; Tomson, G; Woodhouse, W; Ombaka, E; Peralta, AQ; Q	Antibiotic resistance-the need for global solutions	Lancet Infectious Diseases 2013; 13(12): 1057-1098	1211	6	201.833
Park, BJ; Wannemuehler, KA; Marston, BJ; Govender, N; Pappas, PG; Chiller, TA	Estimation of the current global burden of cryptococcal meningitis among persons living with HIV/AIDS	Aids 2009; 23(4): 525-530	1197	10	119.7
ONCOLOGY
Autores	Titulo	Fuente	Citas	Intervalo años	Citas/año
Jemal, A; Bray, F; Center, MM; Ferlay, J; Ward, E; Forman, D	Global Cancer Statistics	Ca-a Cancer Journal For Clinicians 2011; 61(2): 69-90	24184	8	3023
Torre, LA; Bray, F; Siegel, RL; Ferlay, J; Lortet-Tieulent, J; Jemal, A	Global Cancer Statistics, 2012	Ca-a Cancer Journal For Clinicians 2015; 65(2): 87-108	14665	4	3666.25
Ferlay, J; Soerjomataram, I; Dikshit, R; Eser, S; Mathers, C; Rebelo, M; Parkin, DM; Forman, D; Bray, F	Cancer incidence and mortality worldwide: Sources, methods and major patterns in GLOBOCAN 2012	International Journal of Cancer 2015; 136(5): E359-E386	11920	4	2980
Ferlay, J; Shin, HR; Bray, F; Forman, D; Mathers, C; Parkin, DM	Estimates of worldwide burden of cancer in 2008: GLOBOCAN 2008	International Journal of Cancer 2010; 127(12): 2893-2917	10446	9	1160.67
Siegel, R; Naishadham, D; Jemal, A	Cancer Statistics, 2012	Ca-a Cancer Journal For Clinicians 2012; 62(1): 10-29	10310	7	1472.86
Jemal, A; Siegel, R; Xu, JQ; Ward, E	Cancer Statistics, 2010	Ca-a Cancer Journal For Clinicians 2010; 60(5): 277-300	10305	9	1145
Siegel, RL; Miller, KD; Jemal, A	Cancer Statistics, 2016	Ca-a Cancer Journal For Clinicians 2016; 66(1): 7-30	9974	3	3324.67
Eisenhauer, EA; Therasse, P; Bogaerts, J; Schwartz, LH; Sargent, D; Ford, R; Dancey, J; Arbuck, S; Gwyther, S; Mooney, M; Rubinstein, L; Shankar, L; Dodd, L; Kaplan, R; Lacombe, D; Verweij, J	New response evaluation criteria in solid tumours: Revised RECIST guideline (version 1.1)	European Journal of Cancer 2009; 45(2): 228-247	9896	10	989.6
Siegel, R; Naishadham, D; Jemal, A	Cancer statistics, 2013	Ca-a Cancer Journal For Clinicians 2013; 63(1): 11-30	9669	6	1611.5
Siegel, R; Ma, JM; Zou, ZH; Jemal, A	Cancer Statistics, 2014	Ca-a Cancer Journal For Clinicians 2014; 64(1): 9-29	8974	5	1794.8
PEDIATRICS
Autores	Titulo	Fuente	Citas	Intervalo años	Citas/año
Merikangas, KR; He, JP; Burstein, M; Swanson, SA; Avenevoli, S; Cui, LH; Benjet, C; Georgiades, K; Swendsen, J	Lifetime Prevalence of Mental Disorders in U.S. Adolescents: Results from the National Comorbidity Survey Replication-Adolescent Supplement (NCS-A)	Journal of the American Academy of Child and Adolescent Psychiatry 2010; 49(10): 980-989	1965	9	218.333
Shonkoff, JP; Garner, AS	The Lifelong Effects of Early Childhood Adversity and Toxic Stress	Pediatrics 2012; 129(1): E232-E246	1243	7	177.571
Husby, S; Koletzko, S; Korponay-Szabo, IR; Mearin, ML; Phillips, A; Shamir, R; Troncone, R; Giersiepen, K; Branski, D; Catassi, C; Lelgeman, M; Maki, M; Ribes-Koninckx, C; Ventura, A; Zimmer, KP	European Society for Pediatric Gastroenterology, Hepatology, and Nutrition Guidelines for the Diagnosis of Coeliac Disease	Journal of Pediatric Gastroenterology and Nutrition 2012; 54(1): 136-160	1192	7	170.286
Stoll, BJ; Hansen, NI; Bell, EF; Shankaran, S; Laptook, AR; Walsh, MC; Hale, EC; Newman, NS; Schibler, K; Carlo, WA; Kennedy, KA; Poindexter, BB; Finer, NN; Ehrenkranz, RA; Duara, S; Sanchez, PJ; O´Shea, TM;	Neonatal Outcomes of Extremely Preterm Infants From the NICHD Neonatal Research Network	Pediatrics 2010; 126(3): 443-456	1131	9	125.667
Cole, TJ; Lobstein, T	Extended international (IOTF) body mass index cut-offs for thinness, overweight and obesity	Pediatric Obesity 2012; 7(4): 284-294	922	7	131.714
Fenton, TR; Kim, JH	A systematic review and meta-analysis to revise the Fenton growth chart for preterm infants	Bmc Pediatrics 2013; 13(): 0-0	912	6	152
Dawson, G; Rogers, S; Munson, J; Smith, M; Winter, J; Greenson, J; Donaldson, A; Varley, J	Randomized, Controlled Trial of an Intervention for Toddlers With Autism: The Early Start Denver Model	Pediatrics 2010; 125(1): E17-E23	850	9	94.4444
Wolraich, M; Brown, L; Brown, RT; DuPaul, G; Earls, M; Feldman, HM; Ganiats, TG; Kaplanek, B; Meyer, B; Perrin, J; Pierce, K; Reiff, M; Stein, MT; Visser, S	ADHD: Clinical Practice Guideline for the Diagnosis, Evaluation, and Treatment of Attention-Deficit/Hyperactivity Disorder in Children and Adolescents	Pediatrics 2011; 128(5): 1007-1022	779	8	97.375
Wang, J; Iannotti, RJ; Nansel, TR	School Bullying Among Adolescents in the United States: Physical, Verbal, Relational, and Cyber	Journal of Adolescent Health 2009; 45(4): 368-375	726	10	72.6
Boyle, CA; Boulet, S; Schieve, LA; Cohen, RA; Blumberg, SJ; Yeargin-Allsopp, M; Visser, S; Kogan, MD	Trends in the Prevalence of Developmental Disabilities in US Children, 1997-2008	Pediatrics 2011; 127(6): 1034-1042	718	8	89.75
PRIMARY HEALTH CARE
Autores	Titulo	Fuente	Citas	Intervalo años	Citas/año
Valderas, JM; Starfield, B; Sibbald, B; Salisbury, C; Roland, M	Defining Comorbidity: Implications for Understanding Health and Health Services	Annals of Family Medicine 2009; 7(4): 357-363	555	10	55.5
Bodenheimer, T; Sinsky, C	From Triple to Quadruple Aim: Care of the Patient Requires Care of the Provider	Annals of Family Medicine 2014; 12(6): 573-576	506	5	101.2
Deyo, RA; Mirza, SK; Turner, JA; Martin, BI	Overtreating Chronic Back Pain: Time to Back Off?	Journal of the American Board of Family Medicine 2009; 22(1): 62-68	367	10	36.7
Arroll, B; Goodyear-Smith, F; Crengle, S; Gunn, J; Kerse, N; Fishman, T; Falloon, K; Hatcher, S	Validation of PHQ-2 and PHQ-9 to Screen for Major Depression in the Primary Care Population	Annals of Family Medicine 2010; 8(4): 348-353	325	9	36.1111
Salisbury, C; Johnson, L; Purdy, S; Valderas, JM; Montgomery, AA	Epidemiology and impact of multimorbidity in primary care: a retrospective cohort study	British Journal of General Practice 2011; 61(582): 0-0	321	8	40.125
Nutting, PA; Miller, WL; Crabtree, BF; Jaen, CR; Stewart, EE; Stange, KC	Initial Lessons From the First National Demonstration Project on Practice Transformation to a Patient-Centered Medical Home	Annals of Family Medicine 2009; 7(3): 254-260	321	10	32.1
Petterson, SM; Liaw, WR; Phillips, RL; Rabin, DL; Meyers, DS; Bazemore, AW	Projecting US Primary Care Physician Workforce Needs: 2010-2025	Annals of Family Medicine 2012; 10(6): 503-509	309	7	44.1429
Glynn, LG; Valderas, JM; Healy, P; Burke, E; Newell, J; Gillespie, P; Murphy, AW	The prevalence of multimorbidity in primary care and its effect on health care utilization and cost	Family Practice 2011; 28(5): 516-523	223	8	27.875
Bennett, IM; Chen, J; Soroui, JS; White, S	The Contribution of Health Literacy to Disparities in Self-Rated Health Status and Preventive Health Behaviors in Older Adults	Annals of Family Medicine 2009; 7(3): 204-211	204	10	20.4
Nelson, RH	Hyperlipidemia as a Risk Factor for Cardiovascular Disease	Primary Care 2013; 40(1): 195-+	189	6	31.5
RADIOLOGY, NUCLEAR MEDICINE & MEDICAL IMAGING
Autores	Titulo	Fuente	Citas	Intervalo años	Citas/año
Lang, RM; Badano, LP; Mor-Avi, V; Afilalo, J; Armstrong, A; Ernande, L; Flachskampf, FA; Foster, E; Goldstein, SA; Kuznetsova, T; Lancellotti, P; Muraru, D; Picard, MH; Rietzschel, ER; Rudski, L; Spencer, KT;	Recommendations for Cardiac Chamber Quantification by Echocardiography in Adults: An Update from the American Society of Echocardiography and the European Association of Cardiovascular Imaging	European Heart Journal-cardiovascular Imaging 2015; 16(3): 233-271	4042	4	1010.5
Rubinov, M; Sporns, O	Complex network measures of brain connectivity: Uses and interpretations	Neuroimage 2010; 52(3): 1059-1069	3667	9	407.444
Power, JD; Barnes, KA; Snyder, AZ; Schlaggar, BL; Petersen, SE	Spurious but systematic correlations in functional connectivity MRI networks arise from subject motion	Neuroimage 2012; 59(3): 2142-2154	2832	7	404.571
Smith, SM; Nichols, TE	Threshold-free cluster enhancement: Addressing problems of smoothing, threshold dependence and localisation in cluster inference	Neuroimage 2009; 44(1): 83-98	2147	10	214.7
Wahl, RL; Jacene, H; Kasamon, Y; Lodge, MA	From RECIST to PERCIST: Evolving Considerations for PET Response Criteria in Solid Tumors	Journal of Nuclear Medicine 2009; 50(): 122S-150S	1667	10	166.7
Pignon, JP; le Maitre, A; Maillard, E; Bourhis, J	Meta-analysis of chemotherapy in head and neck cancer (MACH-NC): An update on 93 randomised trials and 17,346 patients	Radiotherapy and Oncology 2009; 92(1): 4-14	1436	10	143.6
Klein, S; Staring, M; Murphy, K; Viergever, MA; Pluim, JPW	elastix: A Toolbox for Intensity-Based Medical Image Registration	Ieee Transactions On Medical Imaging 2010; 29(1): 196-205	1407	9	156.333
Murphy, K; Birn, RM; Handwerker, DA; Jones, TB; Bandettini, PA	The impact of global signal regression on resting state correlations: Are anti-correlated networks introduced?	Neuroimage 2009; 44(3): 893-905	1302	10	130.2
Barentsz, JO; Richenberg, J; Clements, R; Choyke, P; Verma, S; Villeirs, G; Rouviere, O; Logager, V; Futterer, JJ	ESUR prostate MR guidelines 2012	European Radiology 2012; 22(4): 746-757	1284	7	183.429
Van Dijk, KRA; Sabuncu, MR; Buckner, RL	The influence of head motion on intrinsic functional connectivity MRI	Neuroimage 2012; 59(1): 431-438	1278	7	182.571
REHABILITATION
Autores	Titulo	Fuente	Citas	Intervalo años	Citas/año
de Morton, NA	The PEDro scale is a valid measure of the methodological quality of clinical trials: a demographic study	AUSTRALIAN JOURNAL OF PHYSIOTHERAPY 2009; 55(2): 129-133	506	10	50.6
Terrio, H; Brenner, LA; Ivins, BJ; Cho, JM; Helmick, K; Schwab, K; Scally, K; Bretthauer, R; Warden, D	Traumatic Brain Injury Screening: Preliminary Findings in a US Army Brigade Combat Team	Journal of Head Trauma Rehabilitation 2009; 24(1): 14-23	471	10	47.1
Zijlstra, A; Mancini, M; Lindemann, U; Chiari, L; Zijlstra, W	Sit-stand and stand-sit transitions in older adults and patients with Parkinson´s disease: event detection based on motion sensors versus force plates	Journal of Neuroengineering and Rehabilitation 2012; 9(): 0-0	459	7	65.5714
Corrigan, JD; Selassie, AW; Orman, JA	The Epidemiology of Traumatic Brain Injury	Journal of Head Trauma Rehabilitation 2010; 25(2): 72-80	430	9	47.7778
Menon, DK; Schwab, K; Wright, DW; Maas, AI	Position Statement: Definition of Traumatic Brain Injury	Archives of Physical Medicine and Rehabilitation 2010; 91(11): 1637-1640	412	9	45.7778
Powers, CM	The Influence of Abnormal Hip Mechanics on Knee Injury: A Biomechanical Perspective	Journal of Orthopaedic & Sports Physical Therapy 2010; 40(2): 42-51	386	9	42.8889
Needham, DM; Korupolu, R; Zanni, JM; Pradhan, P; Colantuoni, E; Palmer, JB; Brower, RG; Fan, E	Early Physical Medicine and Rehabilitation for Patients With Acute Respiratory Failure: A Quality Improvement Project	Archives of Physical Medicine and Rehabilitation 2010; 91(4): 536-542	351	9	39
Banala, SK; Kim, SH; Agrawal, SK; Scholz, JP	Robot Assisted Gait Training With Active Leg Exoskeleton (ALEX)	Ieee Transactions On Neural Systems and Rehabilitation Engineering 2009; 17(1): 2-8	344	10	34.4
Scheme, E; Englehart, K	Electromyogram pattern recognition for control of powered upper-limb prostheses: State of the art and challenges for clinical use	Journal of Rehabilitation Research and Development 2011; 48(6): 643-659	329	8	41.125
Lew, HL; Otis, JD; Tun, C; Kerns, RD; Clark, ME; Cifu, DX	Prevalence of chronic pain, posttraumatic stress disorder, and persistent postconcussive symptoms in OIF/OEF veterans: Polytrauma clinical triad	Journal of Rehabilitation Research and Development 2009; 46(6): 697-702	316	10	31.6
RESPIRATORY SYSTEM
Autores	Titulo	Fuente	Citas	Intervalo años	Citas/año
Raghu, G; Collard, HR; Egan, JJ; Martinez, FJ; Behr, J; Brown, KK; Colby, TV; Cordier, JF; Flaherty, KR; Lasky, JA; Lynch, DA; Ryu, JH; Swigris, JJ; Wells, AU; Ancochea, J; Bouros, D; Carvalho, C; Costabe	An Official ATS/ERSARS/ALAT Statement: Idiopathic Pulmonary Fibrosis: Evidence-based Guidelines for Diagnosis and Management	American Journal of Respiratory and Critical Care Medicine 2011; 183(6): 788-824	3181	8	397.625
Kolh, P; Windecker, S; Alfonso, F; Collet, JP; Cremer, J; Falk, V; Filippatos, G; Hamm, C; Head, SJ; Juni, P; Kappetein, AP; Kastrati, A; Knuuti, J; Landmesser, U; Laufer, G; Neumann, FJ; Richter, DJ; Sch	2014 ESC/EACTS Guidelines on myocardial revascularization	European Journal of Cardio-thoracic Surgery 2014; 46(4): 517-592	2983	5	596.6
Lip, GYH; Nieuwlaat, R; Pisters, R; Lane, DA; Crijns, HJGM	Refining Clinical Risk Stratification for Predicting Stroke and Thromboembolism in Atrial Fibrillation Using a Novel Risk Factor-Based Approach The Euro Heart Survey on Atrial Fibrillation	Chest 2010; 137(2): 263-272	2898	9	322
Vestbo, J; Hurd, SS; Agusti, AG; Jones, PW; Vogelmeier, C; Anzueto, A; Barnes, PJ; Fabbri, LM; Martinez, FJ; Nishimura, M; Stockley, RA; Sin, DD; Rodriguez-Roisin, R	Global Strategy for the Diagnosis, Management, and Prevention of Chronic Obstructive Pulmonary Disease GOLD Executive Summary	American Journal of Respiratory and Critical Care Medicine 2013; 187(4): 347-365	2851	6	475.167
Pisters, R; Lane, DA; Nieuwlaat, R; de Vos, CB; Crijns, HJGM; Lip, GYH	A Novel User-Friendly Score (HAS-BLED) To Assess 1-Year Risk of Major Bleeding in Patients With Atrial Fibrillation The Euro Head Survey	Chest 2010; 138(5): 1093-1100	1985	9	220.556
Vahanian, A; Alfieri, O; Andreotti, F; Antunes, MJ; Baron-Esquivias, G; Baumgartner, H; Borger, MA; Carrel, TP; De Bonis, M; Evangelista, A; Falk, V; Iung, B; Lancellotti, P; Pierard, L; Price, S; Schafers, HJ;	Guidelines on the management of valvular heart disease (version 2012)	European Journal of Cardio-thoracic Surgery 2012; 42(4): S1-S44	1757	7	251
Kearon, C; Akl, EA; Comerota, AJ; Prandoni, P; Bounameaux, H; Goldhaber, SZ; Nelson, ME; Wells, PS; Gould, MK; Dentali, F; Crowther, M; Kahn, SR	Antithrombotic Therapy for VTE Disease Antithrombotic Therapy and Prevention of Thrombosis, 9th ed: American College of Chest Physicians Evidence- Based Clinical Practice Guidelines	Chest 2012; 141(2): E419S-+	1697	7	242.429
Quanjer, PH; Stanojevic, S; Cole, TJ; Baur, X; Hall, GL; Culver, BH; Enright, PL; Hankinson, JL; Ip, MSM; Zheng, JP; Stocks, J	Multi-ethnic reference values for spirometry for the 3-95-yr age range: the global lung function 2012 equations	European Respiratory Journal 2012; 40(6): 1324-1343	1406	7	200.857
Kearon, C; Akl, EA; Ornelas, J; Blaivas, A; Jimenez, D; Bounameaux, H; Huisman, M; King, CS; Morris, TA; Sood, N; Stevens, SM; Vintch, JRE; Wells, P; Woller, SC; Moores, L	Antithrombotic Therapy for VTE Disease CHEST Guideline and Expert Panel Report	Chest 2016; 149(2): 315-352	1351	3	450.333
Kirchhof, P; Benussi, S; Kotecha, D; Ahlsson, A; Atar, D; Casadei, B; Castella, M; Diener, HC; Heidbuchel, H; Hendriks, J; Hindricks, G; Manolis, AS; Oldgren, J; Popescu, BA; Schotten, U; Van Putte, B; Varda	2016 ESC Guidelines for the management of atrial fibrillation developed in collaboration with EACTS	European Journal of Cardio-thoracic Surgery 2016; 50(5): E1-E88	1268	3	422.667
RHEUMATOLOGY
Autores	Titulo	Fuente	Citas	Intervalo años	Citas/año
Aletaha, D; Neogi, T; Silman, AJ; Funovits, J; Felson, DT; Bingham, CO; Birnbaum, NS; Burmester, GR; Bykerk, VP; Cohen, MD; Combe, B; Costenbader, KH; Dougados, M; Emery, P; Ferraccioli, G; Hazes, JMW; Hobbs	2010 Rheumatoid Arthritis Classification Criteria An American College of Rheumatology/European League Against Rheumatism Collaborative Initiative	Arthritis and Rheumatism 2010; 62(9): 2569-2581	2802	9	311.333
Jennette, JC; Falk, RJ; Bacon, PA; Basu, N; Cid, MC; Ferrario, F; Flores-Suarez, LF; Gross, WL; Guillevin, L; Hagen, EC; Hoffman, GS; Jayne, DR; Kallenberg, CGM; Lamprecht, P; Langford, CA; Luqmani, RA; Mahr	2012 Revised International Chapel Hill Consensus Conference Nomenclature of Vasculitides	Arthritis and Rheumatism 2013; 65(1): 1-11	1810	6	301.667
Wolfe, F; Clauw, DJ; Fitzcharles, MA; Goldenberg, DL; Katz, RS; Mease, P; Russell, AS; Russell, IJ; Winfield, JB; Yunus, MB	The American College of Rheumatology Preliminary Diagnostic Criteria for Fibromyalgia and Measurement of Symptom Severity	Arthritis Care & Research 2010; 62(5): 600-610	1590	9	176.667
Aletaha, D; Neogi, T; Silman, AJ; Funovits, J; Felson, DT; Bingham, CO; Birnbaum, NS; Burmester, GR; Bykerk, VP; Cohen, MD; Combe, B; Costenbader, KH; Dougados, M; Emery, P; Ferraccioli, G; Hazes, JMW; Hobbs	2010 Rheumatoid arthritis classification criteria: an American College of Rheumatology/European League Against Rheumatism collaborative initiative	Annals of the Rheumatic Diseases 2010; 69(9): 1580-1588	1500	9	166.667
Rudwaleit, M; van der Heijde, D; Landewe, R; Listing, J; Akkoc, N; Brandt, J; Braun, J; Chou, CT; Collantes-Estevez, E; Dougados, M; Huang, F; Gu, J; Khan, MA; Kirazli, Y; Maksymowych, WP; Mielants, H; Soren	The development of Assessment of SpondyloArthritis international Society classification criteria for axial spondyloarthritis (part II): validation and final selection	Annals of the Rheumatic Diseases 2009; 68(6): 777-783	1325	10	132.5
Hochberg, MC; Altman, RD; April, KT; Benkhalti, M; Guyatt, G; McGowan, J; Towheed, T; Welch, V; Wells, G; Tugwell, P	American College of Rheumatology 2012 recommendations for the use of nonpharmacologic and pharmacologic therapies in osteoarthritis of the hand, hip, and knee	Arthritis Care & Research 2012; 64(4): 465-474	1266	7	180.857
Petri, M; Orbai, AM; Alarcon, GS; Gordon, C; Merrill, JT; Fortin, PR; Bruce, IN; Isenberg, D; Wallace, DJ; Nived, O; Sturfelt, G; Ramsey-Goldman, R; Bae, SC; Hanly, JG; Sanchez-Guerrero, J; Clarke, A; Aranow	Derivation and validation of the systemic lupus international collaborating clinics classification criteria for systemic lupus erythematosus	Arthritis and Rheumatism 2012; 64(8): 2677-2686	1258	7	179.714
Hawker, GA; Mian, S; Kendzerska, T; French, M	Measures of Adult Pain Visual Analog Scale for Pain (VAS Pain), Numeric Rating Scale for Pain (NRS Pain), McGill Pain Questionnaire (MPQ), Short-Form McGill Pain Questionnaire (SF-MPQ), Chronic Pain Grade Scale (CPGS), Short Form-36 Bodily Pain Scale (SF-	Arthritis Care & Research 2011; 63(): S240-S252	1091	8	136.375
Singh, JA; Furst, DE; Bharat, A; Curtis, JR; Kavanaugh, AF; Kremer, JM; Moreland, LW; O´Dell, J; Winthrop, KL; Beukelman, T; Bridges, SL; Chatham, WW; Paulus, HE; Suarez-Almazor, M; Bombardier, C; Dougados, M;	2012 Update of the 2008 American College of Rheumatology Recommendations for the Use of Disease-Modifying Antirheumatic Drugs and Biologic Agents in the Treatment of Rheumatoid Arthritis	Arthritis Care & Research 2012; 64(5): 625-639	988	7	141.143
van den Hoogen, F; Khanna, D; Fransen, J; Johnson, SR; Baron, M; Tyndall, A; Matucci-Cerinic, M; Naden, RP; Medsger, TA; Carreira, PE; Riemekasten, G; Clements, PJ; Denton, CP; Distler, O; Allanore, Y; Furst, D	2013 Classification Criteria for Systemic Sclerosis An American College of Rheumatology/European League Against Rheumatism Collaborative Initiative	Arthritis and Rheumatism 2013; 65(11): 2737-2747	940	6	156.667
SURGERY
Autores	Titulo	Fuente	Citas	Intervalo años	Citas/año
Kolh, P; Windecker, S; Alfonso, F; Collet, JP; Cremer, J; Falk, V; Filippatos, G; Hamm, C; Head, SJ; Juni, P; Kappetein, AP; Kastrati, A; Knuuti, J; Landmesser, U; Laufer, G; Neumann, FJ; Richter, DJ; Sch	2014 ESC/EACTS Guidelines on myocardial revascularization	European Journal of Cardio-thoracic Surgery 2014; 46(4): 517-592	2983	5	596.6
Moher, D; Hopewell, S; Schulz, KF; Montori, V; Gotzsche, PC; Devereaux, PJ; Elbourne, D; Egger, M; Altman, DG	CONSORT 2010 explanation and elaboration: Updated guidelines for reporting parallel group randomised trials	International Journal of Surgery 2012; 10(1): 28-55	2808	7	401.143
Vahanian, A; Alfieri, O; Andreotti, F; Antunes, MJ; Baron-Esquivias, G; Baumgartner, H; Borger, MA; Carrel, TP; De Bonis, M; Evangelista, A; Falk, V; Iung, B; Lancellotti, P; Pierard, L; Price, S; Schafers, HJ;	Guidelines on the management of valvular heart disease (version 2012)	European Journal of Cardio-thoracic Surgery 2012; 42(4): S1-S44	1757	7	251
Kirchhof, P; Benussi, S; Kotecha, D; Ahlsson, A; Atar, D; Casadei, B; Castella, M; Diener, HC; Heidbuchel, H; Hendriks, J; Hindricks, G; Manolis, AS; Oldgren, J; Popescu, BA; Schotten, U; Van Putte, B; Varda	2016 ESC Guidelines for the management of atrial fibrillation developed in collaboration with EACTS	European Journal of Cardio-thoracic Surgery 2016; 50(5): E1-E88	1268	3	422.667
Agha, RA; Fowler, AJ; Saeta, A; Barai, I; Rajmohan, S; Orgill, DP; Afifi, R; Al-Ahmadi, R; Albrecht, J; Alsawadi, A; Aronson, J; Ather, MH; Bashashati, M; Basu, S; Bradley, P; Chalkoo, M; Challacombe, B;	The SCARE Statement: Consensus-based surgical case report guidelines	International Journal of Surgery 2016; 34(): 180-186	1179	3	393
Lafaro, KJ; Demirjian, AN; Pawlik, TM	Epidemiology of Hepatocellular Carcinoma	Surgical Oncology Clinics of North America 2015; 24(1): 1-+	922	4	230.5
Kurman, RJ; Shih, IM	The Origin and Pathogenesis of Epithelial Ovarian Cancer: A Proposed Unifying Theory	American Journal of Surgical Pathology 2010; 34(3): 433-443	903	9	100.333
von Elm, E; Altman, DG; Egger, M; Pocock, SJ; Gotzsche, PC; Vandenbroucke, JP	The Strengthening the Reporting of Observational Studies in Epidemiology (STROBE) Statement: Guidelines for reporting observational studies	International Journal of Surgery 2014; 12(12): 1495-1499	874	5	174.8
Nashef, SAM; Roques, F; Sharples, LD; Nilsson, J; Smith, C; Goldstone, AR; Lockowandt, U	EuroSCORE II dagger	European Journal of Cardio-thoracic Surgery 2012; 41(4): 734-745	865	7	123.571
Makary, MA; Segev, DL; Pronovost, PJ; Syin, D; Bandeen-Roche, K; Patel, P; Takenaga, R; Devgan, L; Holzmueller, CG; Tian, J; Fried, LP	Frailty as a Predictor of Surgical Outcomes in Older Patients	Journal of the American College of Surgeons 2010; 210(6): 901-908	829	9	92.1111
UROLOGY & NEPHROLOGY
Autores	Titulo	Fuente	Citas	Intervalo años	Citas/año
Matsuo, S; Imai, E; Horio, M; Yasuda, Y; Tomita, K; Nitta, K; Yamagata, K; Tomino, Y; Yokoyama, H; Hishida, A	Revised Equations for Estimated GFR From Serum Creatinine in Japan	American Journal of Kidney Diseases 2009; 53(6): 982-992	2907	10	290.7
Schwartz, GJ; Munoz, A; Schneider, MF; Mak, RH; Kaskel, F; Warady, BA; Furth, SL	New Equations to Estimate GFR in Children with CKD	Journal of the American Society of Nephrology 2009; 20(3): 629-637	1369	10	136.9
Campbell, SC; Novick, AC; Belldegrun, A; Blute, ML; Chow, GK; Derweesh, IH; Faraday, MM; Kaouk, JH; Leveillee, RJ; Matin, SF; Russo, P; Uzzo, RG	Guideline for Management of the Clinical T1 Renal Mass	Journal of Urology 2009; 182(4): 1271-1279	1231	10	123.1
Heidenreich, A; Bastian, PJ; Bellmunt, J; Bolla, M; Joniau, S; van der Kwast, T; Mason, M; Matveev, V; Wiegel, T; Zattoni, F; Mottet, N	EAU Guidelines on Prostate Cancer. Part 1: Screening, Diagnosis, and Local Treatment with Curative Intent-Update 2013	European Urology 2014; 65(1): 124-137	1190	5	238
Ljungberg, B; Bensalah, K; Canfield, S; Dabestani, S; Hofmann, F; Hora, M; Kuczyk, MA; Lam, T; Marconi, L; Merseburger, AS; Mulders, P; Powles, T; Staehler, M; Volpe, A; Bex, A	EAU Guidelines on Renal Cell Carcinoma: 2014 Update	European Urology 2015; 67(5): 913-924	1031	4	257.75
Ljungberg, B; Cowan, NC; Hanbury, DC; Hora, M; Kuczyk, MA; Merseburger, AS; Patard, JJ; Mulders, PFA; Sinescu, IC	EAU Guidelines on Renal Cell Carcinoma: The 2010 Update	European Urology 2010; 58(3): 398-406	1025	9	113.889
Heidenreich, A; Bellmunt, J; Bolla, M; Joniau, S; Mason, M; Matveev, V; Mottet, N; Schmid, HP; van der Kwast, T; Wiegel, T; Zattoni, F	EAU Guidelines on Prostate Cancer. Part 1: Screening, Diagnosis, and Treatment of Clinically Localised Disease	European Urology 2011; 59(1): 61-71	1018	8	127.25
Kutikov, A; Uzzo, RG	The RENAL Nephrometry Score: A Comprehensive Standardized System for Quantitating Renal Tumor Size, Location and Depth	Journal of Urology 2009; 182(3): 844-853	1005	10	100.5
Haylen, BT; de Ridder, D; Freeman, RM; Swift, SE; Berghmans, B; Lee, J; Monga, A; Petri, E; Rizk, DE; Sand, PK; Schaer, GN	An International Urogynecological Association (IUGA)/International Continence Society (ICS) joint report on the terminology for female pelvic floor dysfunction	International Urogynecology Journal 2010; 21(1): 5-26	852	9	94.6667
Center, MM; Jemal, A; Lortet-Tieulent, J; Ward, E; Ferlay, J; Brawley, O; Bray, F	International Variation in Prostate Cancer Incidence and Mortality Rates	European Urology 2012; 61(6): 1079-1092	824	7	117.714

## Sheet: Suplem. 2. Colab. int. ÁREAS
ALLERGY	ISSN	FI 2018			JOURNAL OF ALLERGY AND CLINICAL IMMUNOLOGY	JOURNAL OF ALLERGY AND CLINICAL IMMUNOLOGY-IN PRACTICE	CLINICAL REVIEWS IN ALLERGY & IMMUNOLOGY	ALLERGY	CONTACT DERMATITIS	Total
JOURNAL OF ALLERGY AND CLINICAL IMMUNOLOGY	0091-6749	14.11		H-Index	262	40	67	156	88
JOURNAL OF ALLERGY AND CLINICAL IMMUNOLOGY-IN PRACTICE	2213-2198	7.55		2009	23.22	-	30.77	34.57	10.05	24.6525
CLINICAL REVIEWS IN ALLERGY & IMMUNOLOGY	1080-0549	7.328		2010	25.86	-	18.18	31.94	24.18	25.04
ALLERGY	0105-4538	6.771		2011	28.98	-	18.52	31.72	18.55	24.4425
CONTACT DERMATITIS	0105-1873	5.504		2012	32.25	-	20.97	38.81	17.28	27.3275
				2013	30.81	18.38	18.46	43.35	22.67	26.734
				2014	36.54	14.71	27.42	45.87	18.83	28.674
				2015	38.3	12.76	44.23	44.29	13.94	30.704
				2016	37.19	19.86	26.98	50.23	15.08	29.868
				2017	40.57	18.77	36.49	51.57	13.79	32.238
				2018	38.65	25.06	29.89	53.4	21.36	33.672
				Total	33.237	18.2567	27.191	42.575	17.573	27.7665
CARDIAC & CARDIOVASCULAR SYSTEM	ISSN	FI 2018			EUROPEAN HEART JOURNAL	CIRCULATION	JOURNAL OF THE AMERICAN COLLEGE OF CARDIOLOGY	NATURE REVIEWS CARDIOLOGY	CIRCULATION RESEARCH	Total
EUROPEAN HEART JOURNAL	0195-668X	24.889		H-Index	265	570	394	105	306
CIRCULATION	0009-7322	23.054		2009	24.95	24.58	17.13	13.25	37.16	23.414
JOURNAL OF THE AMERICAN COLLEGE OF CARDIOLOGY	0735-1097	18.639		2010	31.26	28.65	17.36	7.56	30.19	23.004
NATURE REVIEWS CARDIOLOGY	1759-5002	17.42		2011	33.52	24.09	19.92	6.43	28.53	22.498
CIRCULATION RESEARCH	0009-7330	15.862		2012	31.1	24.09	20.17	9.66	23.75	21.754
				2013	31.49	24.03	21.65	8.57	27.59	22.666
				2014	30.87	23.24	22.21	10.86	30.65	23.566
				2015	29.25	24.18	16.76	10.78	29.61	22.116
				2016	28.96	26.61	20.08	16.83	33.42	25.18
				2017	32.95	28.96	21.59	22.78	25.06	26.268
				2018	41.81	42.74	23.84	15.82	40.54	32.95
				Total	31.616	45.195	20.071	12.254	30.65	27.9572
CLINICAL NEUROLOGY	ISSN	FI 2018			LANCET NEUROLOGY	NATURE REVIEWS NEUROLOGY	ACTA NEUROPATHOLOGICA	ALZHEIMERS & DEMENTIA	JAMA NEUROLOGY	Total
LANCET NEUROLOGY	1474-4422	28.755		H-Index	259	124	146	94	207
NATURE REVIEWS NEUROLOGY	1759-4758	21.155		2009	19.92	9.64	33.09	15.71	18.21	19.314
ACTA NEUROPATHOLOGICA	0001-6322	18.174		2010	22.96	12.37	33.33	20	21.36	22.004
ALZHEIMERS & DEMENTIA	1552-5260	14.423		2011	31.25	11.52	42.14	24.71	18.18	25.56
JAMA NEUROLOGY	2168-6149	12.321		2012	27.43	11.98	55.78	29.76	17.93	28.576
				2013	27.35	15.26	42.38	41.07	21.34	29.48
				2014	29.37	18.6	51.97	34.97	27.06	32.394
				2015	25.36	21.47	50.36	45.95	21.88	33.004
				2016	27.98	15.93	45.38	39.84	20	29.826
				2017	27.41	19.61	56.12	45.83	23.01	34.396
				2018	32.32	22.64	65.31	55.77	27.33	40.674
				Total	27.135	26.5033	47.586	35.361	21.63	31.6431
CRITICAL CARE MEDICINE	ISSN	FI 2018			LANCET RESPIRATORY MEDICINE	INTENSIVE CARE MEDICINE	AMERICAN JOURNAL OF RESPIRATORY AND CRITICAL CARE MEDICINE	CHEST	CRITICAL CARE MEDICINE	Total
LANCET RESPIRATORY MEDICINE	2213-2600	22.992		H-Index	79	176	343	267	249
INTENSIVE CARE MEDICINE	0342-4642	18.967		2009	-	28.53	28.1	13.41	14.73	21.1925
AMERICAN JOURNAL OF RESPIRATORY AND CRITICAL CARE MEDICINE	1073-449X	16.494		2010	-	25.93	29.42	20.29	14.86	22.625
CHEST	0012-3692	9.657		2011	-	26.94	27.83	18.63	16.12	22.38
CRITICAL CARE MEDICINE	0090-3493	6.971		2012	-	27.41	24.49	21.74	15.34	22.245
				2013	22.46	33.25	25.56	19.95	17.83	23.81
				2014	24.09	35.15	25.74	21.28	17.4	24.732
				2015	22.82	38.08	24.76	21.7	21.9	25.852
				2016	22.71	47.15	28.01	20.55	20.88	27.86
				2017	29.23	53.18	30.75	19.3	22.12	30.916
				2018	29.87	53.32	33.06	20.79	25.96	32.6
				Total	25.1967	61.49	27.772	19.764	18.714	30.5873
DENTISTRY, ORAL SURGERY & MEDICINE	ISSN	FI 2018			PERIODONTOLOGY 2000	JOURNAL OF DENTAL RESEARCH	DENTAL MATERIALS	JOURNAL OF CLINICAL PERIODONTOLOGY	CLINICAL ORAL IMPLANTS RESEARCH	Total
PERIODONTOLOGY 2000	0906-6713	7.861		H-Index	107	158	132	132	145
JOURNAL OF DENTAL RESEARCH	0022-0345	5.125		2009	0	31.52	40.48	35.33	36.73	28.812
DENTAL MATERIALS	0109-5641	4.44		2010	0	35.95	46.34	40.44	35.4	31.626
JOURNAL OF CLINICAL PERIODONTOLOGY	0303-6979	4.164		2011	0	35.62	42.11	29.45	42.61	29.958
CLINICAL ORAL IMPLANTS RESEARCH	0905-7161	3.825		2012	0	39.22	43.09	41.25	41.48	33.008
				2013	0	33.49	54.44	40.94	39.27	33.628
				2014	0	38.79	53.68	45.33	46.22	36.804
				2015	0	30.57	54.45	42.58	51.67	35.854
				2016	7.89	36.23	56.93	41.04	47.75	37.968
				2017	0	38.58	53.89	49.68	47.92	38.014
				2018	13.95	42.63	48.56	44.31	56.78	41.246
				Total	2.184	60.4333	49.397	41.035	44.583	39.5265
EMERGENCY MEDICINE	ISSN	FI 2018			ANNALS OF EMERGENCY MEDICINE	RESUSCITATION	WORLD JOURNAL OF EMERGENCY SURGERY	EMERGENCIAS	ACADEMIC EMERGENCY MEDICINE	Total
ANNALS OF EMERGENCY MEDICINE	0196-0644	5.209		H-Index	141	123	33	25	110
RESUSCITATION	0300-9572	4.572		2009	6.33	14.01	17.78	-	6.23	11.0875
WORLD JOURNAL OF EMERGENCY SURGERY	1749-7922	3.798		2010	5.97	22.22	17.86	1.19	6.9	10.828
EMERGENCIAS	1137-6821	3.35		2011	4.71	17	17.78	2.19	5.97	9.53
ACADEMIC EMERGENCY MEDICINE	1069-6563	2.963		2012	8.7	20.25	31.37	1.61	11.54	14.694
				2013	4.36	16.08	25	4.51	11.52	12.294
				2014	6.52	22.8	21.43	2.38	5.71	11.768
				2015	9.16	26.83	30.65	1.71	13.28	16.326
				2016	6.97	30.39	25	2.8	12.9	15.612
				2017	7.2	26.07	51.02	6.42	12.23	20.588
				2018	9.45	23.13	39.66	6.84	20.72	19.96
				Total	6.937	36.4633	27.755	3.29444	10.7	17.03
ENDOCRINOLOGY & METABOLISM	ISSN	FI 2018			NATURE REVIEWS ENDOCRINOLOGY	LANCET DIABETES & ENDOCRINOLOGY	CELL METABOLISM	DIABETES CARE	JOURNAL OF PINEAL RESEARCH	Total
NATURE REVIEWS ENDOCRINOLOGY	1759-5029	24.646		H-Index	116	77	219	328	113
LANCET DIABETES & ENDOCRINOLOGY	2213-8587	24.54		2009	6.43	-	26.67	26.44	22.55	20.5225
CELL METABOLISM	1550-4131	22.415		2010	6.43	-	36.2	23.12	34.12	24.9675
DIABETES CARE	0149-5992	15.27		2011	4.1	-	35.98	23.09	33.66	24.2075
JOURNAL OF PINEAL RESEARCH	0742-3098	15.221		2012	4.31	-	32.54	26.32	26.09	22.315
				2013	5.8	18.18	42.03	27.21	32.58	25.16
				2014	10.24	28.2	37.55	30.76	33.33	28.016
				2015	5.97	27.94	42.21	30.16	45.45	30.346
				2016	9.9	25	41.54	37.45	40.79	30.936
				2017	10.61	32.93	42	30.83	45.71	32.416
				2018	14.44	32.61	46.49	32.39	40.54	33.294
				Total	7.823	27.4767	38.321	28.777	35.482	27.5759
GASTROENTEROLOGY & HEPATOLOGY	ISSN	FI 2018			NATURE REVIEWS GASTROENTEROLOGY & HEPATOLOGY	GASTROENTEROLOGY	JOURNAL OF HEPATOLOGY	GUT	HEPATOLOGY	Total
NATURE REVIEWS GASTROENTEROLOGY & HEPATOLOGY	1759-5045	23.57		H-Index	105	368	216	262	326
GASTROENTEROLOGY	0016-5085	19.233		2009	7.04	19.53	20.29	18.71	23.54	17.822
JOURNAL OF HEPATOLOGY	0168-8278	18.946		2010	5.74	25.48	24.77	23.7	26.59	21.256
GUT	0017-5749	17.943		2011	7.73	24.13	26.61	29.87	27.17	23.102
HEPATOLOGY	0270-9139	14.971		2012	8.63	25.2	27.88	36.28	30.43	25.684
				2013	12.63	21.44	25.66	35.04	29.65	24.884
				2014	10.61	25.37	30.27	41.81	30.57	27.726
				2015	13	24.92	40.08	44.26	29.15	30.282
				2016	11.23	27.87	41.86	47.12	32.92	32.2
				2017	16.97	24.34	40.35	44.16	33.15	31.794
				2018	22.9	28.67	39.95	38.08	31.25	32.17
				Total	11.648	24.695	31.772	35.903	29.442	26.692
GENETICS & HEREDITY	ISSN	FI 2018			NATURE REVIEWS GENETICS	NATURE GENETICS	TRENDS IN ECOLOGY & EVOLUTION	MOLECULAR BIOLOGY AND EVOLUTION	GENOME BIOLOGY	Total
NATURE REVIEWS GENETICS	1471-0056	43.704		H-Index	320	527	312	197	207
NATURE GENETICS	1061-4036	25.455		2009	10.64	60.59	53.57	40.23	25.54	38.114
TRENDS IN ECOLOGY & EVOLUTION	0169-5347	15.236		2010	12.15	61.87	48.6	41.89	27.23	38.348
MOLECULAR BIOLOGY AND EVOLUTION	0737-4038	14.797		2011	13.19	51.24	46.92	45.7	26.64	36.738
GENOME BIOLOGY	1474-760X	14.028		2012	13.84	51.14	46.03	50.99	22.27	36.854
				2013	18.52	48.85	47.76	48.03	44.21	41.474
				2014	11.26	59.18	46.3	41.43	23.49	36.332
				2015	14.73	53.98	53.72	48.59	41.3	42.464
				2016	12.67	57.53	54.29	44.37	49.25	43.622
				2017	13.89	54.79	62.12	41.34	49.59	44.346
				2018	12.73	56.67	63.11	50.61	42.36	45.096
				Total	13.362	55.584	52.242	45.318	35.188	40.3388
HEMATOLOGY	ISSN	FI 2018			BLOOD	CIRCULATION RESEARCH	LANCET HAEMATOLOGY	LEUKEMIA	JOURNAL OF HEMATOLOGY & ONCOLOGY	Total
BLOOD	0006-4971	16.562		H-Index	426	306	33	176	60
CIRCULATION RESEARCH	0009-7330	15.862		2009	28.69	37.16	-	31.69	17.39	28.7325
LANCET HAEMATOLOGY	2352-3026	11.99		2010	30.65	30.19	-	36.34	19.61	29.1975
LEUKEMIA	0887-6924	9.944		2011	34.22	28.53	-	33.92	27.27	30.985
JOURNAL OF HEMATOLOGY & ONCOLOGY	1756-8722	8.731		2012	33.81	23.75	-	38.89	18.42	28.7175
				2013	33.66	27.59	-	44.53	40.86	36.66
				2014	29.75	30.65	29.03	40	36.56	33.198
				2015	29.95	29.61	24.19	48.21	32.85	32.962
				2016	29.63	33.42	25.83	51.59	33.09	34.712
				2017	28.6	25.06	28.57	45.48	33.14	32.17
				2018	31.03	40.54	26.92	52.51	33.57	36.914
				Total	30.999	30.65	26.908	42.316	29.276	32.0298
IMMUNOLOGY	ISSN	FI 2018			NATURE REVIEWS IMMUNOLOGY	NATURE IMMUNOLOGY	IMMUNITY	ANNUAL REVIEW OF IMMUNOLOGY	LANCET HIV	Total
NATURE REVIEWS IMMUNOLOGY	1474-1733	44.019		H-Index	351	344	355	279	34
NATURE IMMUNOLOGY	1529-2908	23.53		2009	12.04	29.15	25.93	26.09	-	23.3025
IMMUNITY	1074-7613	21.522		2010	12.95	29.72	35.03	13.64	-	22.835
ANNUAL REVIEW OF IMMUNOLOGY	0732-0582	21.429		2011	11.23	27.56	28.9	34.78	-	25.6175
LANCET HIV	2352-3018	14.753		2012	10.59	25.77	36.52	21.43	-	23.5775
				2013	12.62	22.26	43.03	20.83	-	24.685
				2014	13.61	36.36	39.65	18.18	33.33	28.226
				2015	15.23	36.14	43.8	30.77	39.22	33.032
				2016	14.08	42.22	41.94	30.43	49.64	35.662
				2017	17.02	43.06	37.34	21.05	39.44	31.582
				2018	15.13	30.77	35.41	19.35	37.16	27.564
				Total	13.45	32.301	36.755	23.655	39.758	29.1838
INFECTIOUS DISEASES	ISSN	FI 2018			LANCET INFECTIOUS DISEASES	LANCET HIV	CLINICAL INFECTIOUS DISEASES	EUROSURVEILLANCE	EMERGING INFECTIOUS DISEASES	Total
LANCET INFECTIOUS DISEASES	1473-3099	27.516		H-Index	201	34	303	90	202
LANCET HIV	2352-3018	14.753		2009	32.32	-	28.63	0.35	39.53	25.2075
CLINICAL INFECTIOUS DISEASES	1058-4838	9.055		2010	31.82	-	27.89	24.26	33.21	29.295
EUROSURVEILLANCE	1560-7917	7.421		2011	29.67	-	22.84	18.5	34.55	26.39
EMERGING INFECTIOUS DISEASES	1080-6040	7.185		2012	35.89	-	31.78	26.75	35.86	32.57
				2013	31.95	-	27.95	29.93	38.13	31.99
				2014	32.97	33.33	26.57	32.99	40	33.172
				2015	33.65	39.22	31.93	34.24	39.16	35.64
				2016	38.67	49.64	37.01	30	42.26	39.516
				2017	40.95	39.44	39.13	41.1	37.85	39.694
				2018	36.62	37.16	42.33	38.94	42.69	39.548
				Total	34.451	39.758	31.606	27.706	38.324	34.369
ONCOLOGY	ISSN	FI 2018			CA-A CANCER JOURNAL FOR CLINICIANS	NATURE REVIEWS CANCER	LANCET ONCOLOGY	NATURE REVIEWS CLINICAL ONCOLOGY	JOURNAL OF CLINICAL ONCOLOGY	Total
CA-A CANCER JOURNAL FOR CLINICIANS	0007-9235	223.679		H-Index	144	396	274	127	494
NATURE REVIEWS CANCER	1474-175X	51.848		2009	12.82	8.33	21.13	8.87	4.75	11.18
LANCET ONCOLOGY	1470-2045	35.386		2010	10.26	7.5	22.08	7.85	5.48	10.634
NATURE REVIEWS CLINICAL ONCOLOGY	1759-4774	34.106		2011	5	9.69	28.06	10.4	21.11	14.852
JOURNAL OF CLINICAL ONCOLOGY	0732-183X	28.245		2012	10.26	8.6	23.35	10.5	24.61	15.464
				2013	7.5	9.15	27.87	11.94	26.95	16.682
				2014	4.35	9.94	23.56	13.86	25.03	15.348
				2015	9.76	10.77	23.79	13.68	28.19	17.238
				2016	18.6	14.41	20.28	16.47	30.41	20.034
				2017	18.6	16.67	23.56	15.71	32.31	21.37
				2018	20	10.43	24.42	13.26	36.5	20.922
				Total	11.715	10.549	23.81	12.254	23.534	16.3724
PEDIATRICS	ISSN	FI 2018			JAMA PEDIATRICS	JOURNAL OF THE AMERICAN ACADEMY OF CHILD AND ADOLESCENT PSYCHIATRY	PEDIATRICS	PEDIATRIC ALLERGY AND IMMUNOLOGY	JOURNAL OF ADOLESCENT HEALTH	Total
JAMA PEDIATRICS	2168-6203	12.004		H-Index	161	222	311	80	142
JOURNAL OF THE AMERICAN ACADEMY OF CHILD AND ADOLESCENT PSYCHIATRY	0890-8567	6.391		2009	9.52	14.62	13.95	11.11	9.35	11.71
PEDIATRICS	0031-4005	5.401		2010	12.39	18.18	15.09	19.16	14.35	15.834
PEDIATRIC ALLERGY AND IMMUNOLOGY	0905-6157	4.654		2011	9.65	16.2	13.88	19.05	13.92	14.54
JOURNAL OF ADOLESCENT HEALTH	1054-139X	3.957		2012	11.02	14.37	14.89	21.33	19.51	16.224
				2013	10.14	16.95	14.55	24.39	10.87	15.38
				2014	10.69	26.82	15.14	20.61	20.95	18.842
				2015	12.92	25.43	18.58	24.49	20.83	20.45
				2016	17.7	24.86	17.32	29.22	18.63	21.546
				2017	15.01	23.96	16.83	38.03	19.64	22.694
				2018	17.27	17.02	16.13	30.87	18.15	19.888
				Total	12.631	19.841	15.636	23.826	16.62	17.7108
PRIMARY HEALTH CARE	ISSN	FI 2018			BRITISH JOURNAL OF GENERAL PRACTICE	ANNALS OF FAMILY MEDICINE	NPJ PRIMARY CARE RESPIRATORY MEDICINE	AMERICAN FAMILY PHYSICIAN	JOURNAL OF THE AMERICAN BOARD OF FAMILY MEDICINE	Total
BRITISH JOURNAL OF GENERAL PRACTICE	0960-1643	4.434		H-Index	90	98	16	107	73
ANNALS OF FAMILY MEDICINE	1544-1709	4.185		2009	8.31	5.77	-	2.56	5.69	5.5825
NPJ PRIMARY CARE RESPIRATORY MEDICINE	2055-1010	2.82		2010	6.27	8.06	-	1.57	4.14	5.01
AMERICAN FAMILY PHYSICIAN	0002-838X	2.58		2011	7.39	7.63	-	0.94	2.31	4.5675
JOURNAL OF THE AMERICAN BOARD OF FAMILY MEDICINE	1557-2625	2.511		2012	9.23	9.4	-	1.23	2.6	5.615
				2013	5.49	8.03	-	2.15	5.38	5.2625
				2014	9.91	10.85	36.21	1.07	7.26	13.06
				2015	8.21	9.46	39.58	0.74	4.11	12.42
				2016	7.11	7.26	53.85	2.73	1.35	14.46
				2017	6.97	10	36.36	1.86	7.09	12.456
				2018	8.82	12.34	40	1.67	8.89	14.344
				Total	7.771	8.88	41.2	1.652	4.882	12.877
RADIOLOGY, NUCLEAR MEDICINE & MEDICAL IMAGING	ISSN	FI 2018			JACC-CARDIOVASCULAR IMAGING	MEDICAL IMAGE ANALYSIS	IEEE TRANSACTIONS ON MEDICAL IMAGING	RADIOLOGY	JOURNAL OF NUCLEAR MEDICINE	Total
JACC-CARDIOVASCULAR IMAGING	1936-878X	10.975		H-Index	100	113	195	271	195
MEDICAL IMAGE ANALYSIS	1361-8415	8.88		2009	19.82	34.67	27.53	15.05	17.61	22.936
IEEE TRANSACTIONS ON MEDICAL IMAGING	0278-0062	7.816		2010	19.14	36.51	30.36	16.67	18.46	24.228
RADIOLOGY	0033-8419	7.608		2011	21.56	35.29	28.65	19.93	24.39	25.964
JOURNAL OF NUCLEAR MEDICINE	0161-5505	7.354		2012	26.18	35	31.66	22.37	20.17	27.076
				2013	27.19	45.16	39.39	23.55	23.01	31.66
				2014	22.69	48.25	35.98	22.98	28.08	31.596
				2015	24.22	51.3	39.37	22.63	28.26	33.156
				2016	17.25	41.9	42.55	23.28	27.59	30.514
				2017	28.93	48.65	39.13	20.86	28.63	33.24
				2018	25.58	53.39	35.56	22.98	28.8	33.262
				Total	23.256	43.012	35.018	21.03	24.5	29.3632
REHABILITATION	ISSN	FI 2018			JOURNAL OF PHYSIOTHERAPY	ANNALS OF PHYSICAL AND REHABILITATION MEDICINE	NEUROREHABILITATION AND NEURAL REPAIR	JOURNAL OF NEUROENGINEERING AND REHABILITATION	IEEE TRANSACTIONS ON NEURAL SYSTEMS AND REHABILITATION ENGINEERING	Total
JOURNAL OF PHYSIOTHERAPY	1836-9553	5.551		H-Index	61	34	92	75	121
ANNALS OF PHYSICAL AND REHABILITATION MEDICINE	1877-0657	4.196		2009	10.47	19.05	31.43	11.36	25.35	19.532
NEUROREHABILITATION AND NEURAL REPAIR	1545-9683	3.757		2010	4.48	11.36	30.53	21.67	34.25	20.458
JOURNAL OF NEUROENGINEERING AND REHABILITATION	1743-0003	3.582		2011	9.52	9.33	29.47	34.33	25.64	21.658
IEEE TRANSACTIONS ON NEURAL SYSTEMS AND REHABILITATION ENGINEERING	1534-4320	3.478		2012	6.94	15.79	30.77	27.91	34.44	23.17
				2013	7.89	10.81	25	18.64	33.33	19.134
				2014	12.79	5.8	33.7	28.07	36.59	23.39
				2015	18.48	27.14	34.69	22.41	27.19	25.982
				2016	19.54	23.21	34.41	33.66	37.86	29.736
				2017	12.5	25	32.35	27.69	35.32	26.572
				2018	21.69	19.51	43.28	31.97	34.62	30.214
				Total	12.43	16.7	32.563	25.771	32.459	23.9846
RESPIRATORY SYSTEM	ISSN	FI 2018			LANCET RESPIRATORY MEDICINE	AMERICAN JOURNAL OF RESPIRATORY AND CRITICAL CARE MEDICINE	JOURNAL OF THORACIC ONCOLOGY	EUROPEAN RESPIRATORY JOURNAL	CHEST	Total
LANCET RESPIRATORY MEDICINE	2213-2600	22.992		H-Index	79	343	113	216	267
AMERICAN JOURNAL OF RESPIRATORY AND CRITICAL CARE MEDICINE	1073-449X	16.494		2009	-	28.1	19	33.56	13.41	23.5175
JOURNAL OF THORACIC ONCOLOGY	1556-0864	12.46		2010	-	29.42	17.86	36.69	20.29	26.065
EUROPEAN RESPIRATORY JOURNAL	0903-1936	11.807		2011	-	27.83	19.16	35.45	18.63	25.2675
CHEST	0012-3692	9.657		2012	-	24.49	20.45	36.71	21.74	25.8475
				2013	22.46	25.56	18.95	40.59	19.95	25.502
				2014	24.09	25.74	28.26	40.3	21.28	27.934
				2015	22.82	24.76	24.23	43.28	21.7	27.358
				2016	22.71	28.01	28.6	44.58	20.55	28.89
				2017	29.23	30.75	21.5	42.81	19.3	28.718
				2018	29.87	33.06	25.07	54.01	20.79	32.56
				Total	25.1967	27.772	22.308	40.798	19.764	27.1677
RHEUMATOLOGY	ISSN	FI 2018			NATURE REVIEWS RHEUMATOLOGY	ANNALS OF THE RHEUMATIC DISEASES	ARTHRITIS & RHEUMATOLOGY	RHEUMATOLOGY	SEMINARS IN ARTHRITIS AND RHEUMATISM	Total
NATURE REVIEWS RHEUMATOLOGY	1759-4790	18.545		H-Index	113	212	290	156	102
ANNALS OF THE RHEUMATIC DISEASES	0003-4967	14.299		2009	5.29	38.64	32.66	15.74	9.43	20.352
ARTHRITIS & RHEUMATOLOGY	2326-5191	9.002		2010	7.91	44.01	31.42	16.4	22.03	24.354
RHEUMATOLOGY	1462-0324	5.149		2011	8.29	36.87	29.82	16.42	19.05	22.09
SEMINARS IN ARTHRITIS AND RHEUMATISM	0049-0172	5.072		2012	13.78	41.59	28.81	24.63	14.94	24.75
				2013	11.31	37.86	30.21	23.08	23.6	25.212
				2014	11.17	47.58	31.49	25.26	27.59	28.618
				2015	16.46	47.14	31.57	29.61	24.29	29.814
				2016	19.65	53.68	36.02	32.63	31.71	34.738
				2017	13.59	52.97	38.04	27.59	31.06	32.65
				2018	13.92	40.04	39.19	30.02	32.72	31.178
				Total	12.137	44.038	32.923	24.138	23.642	27.3756
SURGERY	ISSN	FI 2018			JAMA SURGERY	ANNALS OF SURGERY	JOURNAL OF HEART AND LUNG TRANSPLANTATION	JOURNAL OF NEUROLOGY NEUROSURGERY AND PSYCHIATRY	AMERICAN JOURNAL OF TRANSPLANTATION	Total
JAMA SURGERY	2168-6254	10.668		H-Index	162	284	122	188	168
ANNALS OF SURGERY	0003-4932	9.476		2009	4.36	15.17	11.93	21.77	21.75	14.996
JOURNAL OF HEART AND LUNG TRANSPLANTATION	1053-2498	8.578		2010	7.76	11.83	15.35	23.45	24.31	16.54
JOURNAL OF NEUROLOGY NEUROSURGERY AND PSYCHIATRY	0022-3050	8.272		2011	5.34	12.24	18.38	22.42	14.97	14.67
AMERICAN JOURNAL OF TRANSPLANTATION	1600-6135	7.163		2012	6.62	16.17	16.89	24.83	18.65	16.632
				2013	6.14	13.81	14.41	25	22.01	16.274
				2014	9.97	17.22	21.17	29.33	18.94	19.326
				2015	8.41	17.2	19.4	34.63	19.69	19.866
				2016	7.03	15.58	21.12	42.06	21.74	21.506
				2017	9.36	17.16	20.36	41.87	23.21	22.392
				2018	7.58	16.44	28.57	39.72	21.17	22.696
				Total	7.257	15.282	18.758	30.508	20.644	18.4898
UROLOGY & NEPHROLOGY	ISSN	FI 2018			NATURE REVIEWS NEPHROLOGY	EUROPEAN UROLOGY	NATURE REVIEWS UROLOGY	JOURNAL OF THE AMERICAN SOCIETY OF NEPHROLOGY	KIDNEY INTERNATIONAL	Total
NATURE REVIEWS NEPHROLOGY	1759-5061	19.684		H-Index	88	187	124	253	250
EUROPEAN UROLOGY	0302-2838	17.298		2009	9.46	19.64	9.64	33.33	18.44	18.102
NATURE REVIEWS UROLOGY	1759-4812	9.333		2010	7.78	25.26	12.37	34.34	21.07	20.164
JOURNAL OF THE AMERICAN SOCIETY OF NEPHROLOGY	1046-6673	8.547		2011	8.77	23.55	11.52	30.95	26.33	20.224
KIDNEY INTERNATIONAL	0085-2538	8.306		2012	11.4	33.33	11.98	34.94	22.1	22.75
				2013	12.44	33.47	15.26	39.51	25.65	25.266
				2014	12.62	36.69	18.6	39.05	27.97	26.986
				2015	13.04	33.9	21.47	41.69	27.41	27.502
				2016	18.07	34.81	15.93	39.38	28.86	27.41
				2017	15.79	34.75	19.61	39.79	28.93	27.774
				2018	18.9	34.55	22.64	37.54	35.32	29.79
				Total	12.827	30.995	15.902	37.052	26.208	24.5968
